# Supplementary material for: Discovery of antibacterial agents targeting biofilm formation: total synthesis and in vitro investigation of amycolasporins
Source: Royal Society of Chemistry journal article supplement (doi:10.1039/d2ob01166b), 2022-01-01
Supplement: d2ob01166b1.pdf [file d2ob01166b1.pdf]

## Supporting Information

### Discovery of Antibacterial Agents Targeting Biofilm Formation: Total Synthesis and *in vitro* Investigation of Amycolasporins

Wenxi Wu,<sup>a</sup> Yu Mu,<sup>a</sup> Junfeng Tan,<sup>a</sup> Zixuan Wang,<sup>a</sup> Chen Zhang,<sup>a</sup> Guiding Li,<sup>a</sup> Ying Jin,<sup>a</sup> Xueshi Huang<sup>a\*</sup> and Li Han<sup>a\*</sup>

*<sup>a</sup>Institute of Microbial Pharmaceuticals, College of Life and Health Sciences,  
Northeastern University, Shenyang 110819, China.*

*\*Corresponding authors*

*Tel: 86-24-8365-6106. Fax: 86-24-8365-6106. E-mail: huangxs@mail.neu.edu.cn (X. Huang);*

*Tel: 86-24-8365-6122. Fax: 86-24-8365-6122. E-mail: hanli@mail.neu.edu.cn (L. Han).*

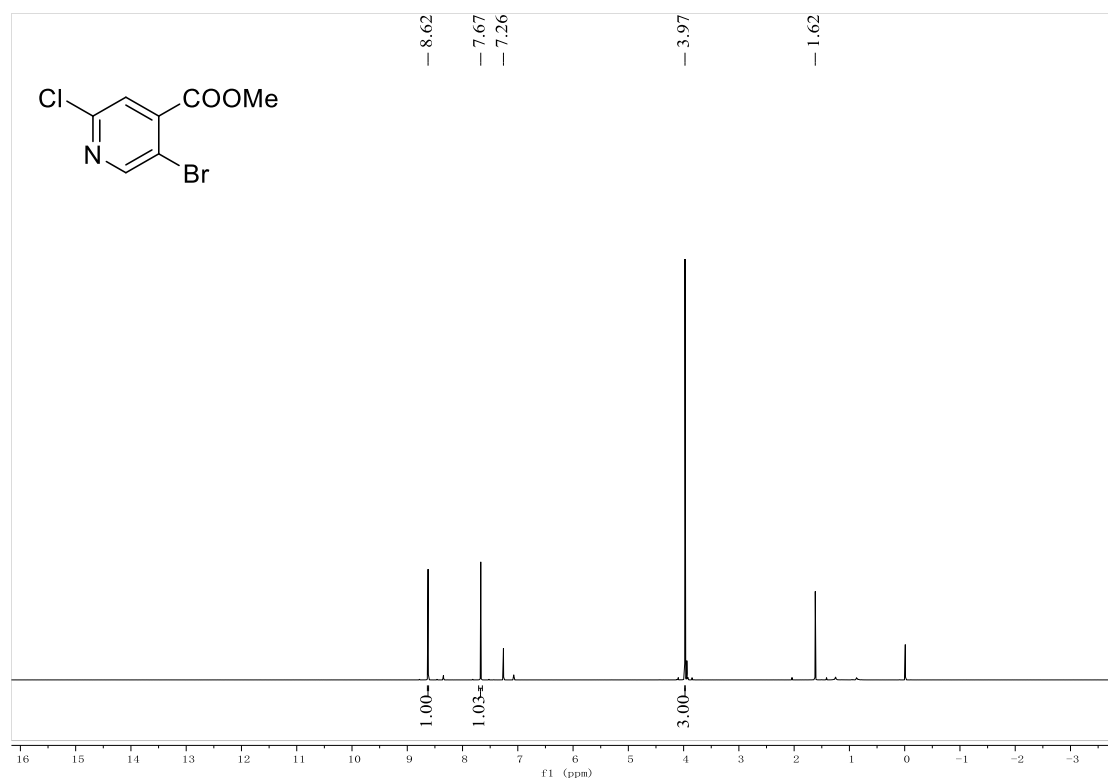

Figure S1  $^1\text{H}$  NMR Spectra of compound **9** (600 MHz,  $\text{CDCl}_3$ )

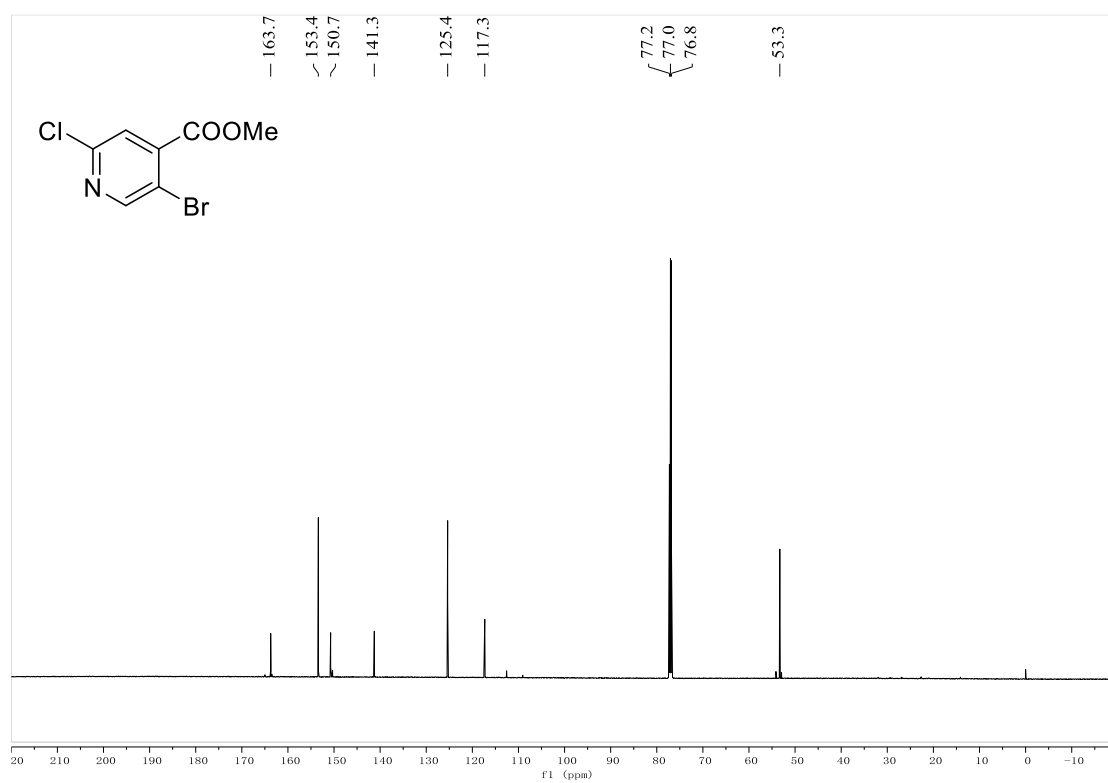

Figure S2  $^{13}\text{C}$  NMR Spectra of compound **9** (150 MHz,  $\text{CDCl}_3$ )

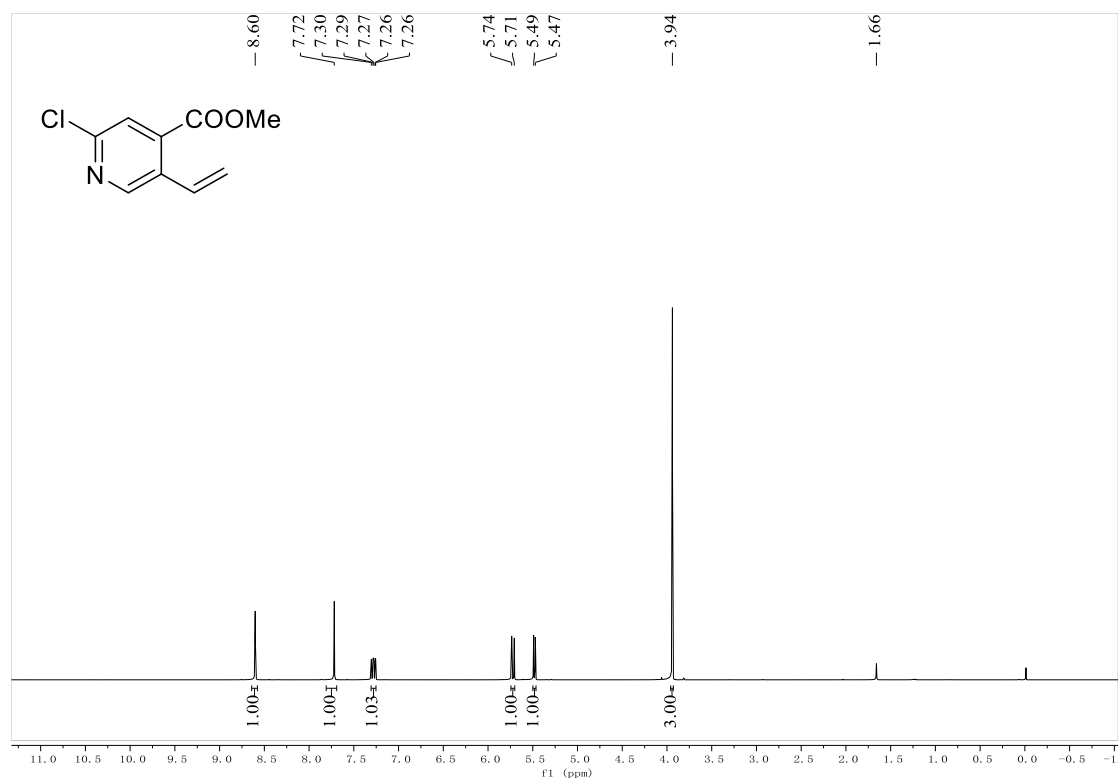

Figure S3 <sup>1</sup>H NMR Spectra of compound **10** (600 MHz, CDCl<sub>3</sub>)

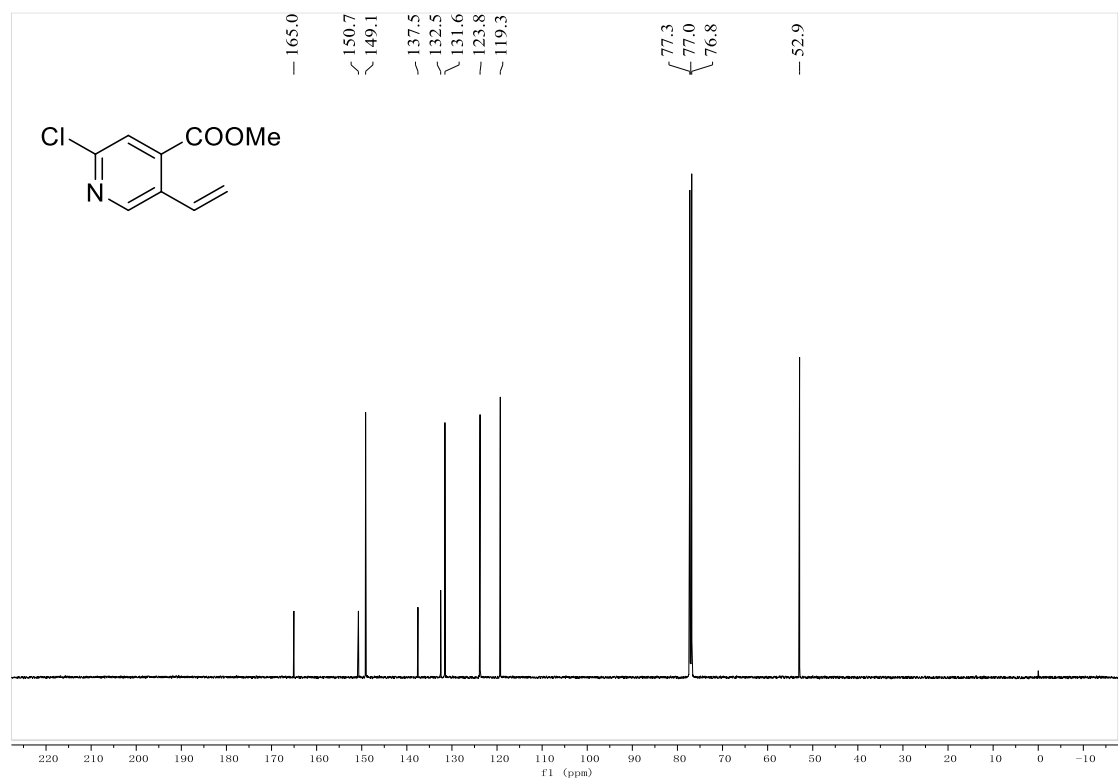

Figure S4 <sup>13</sup>C NMR Spectra of compound **10** (150 MHz, CDCl<sub>3</sub>)

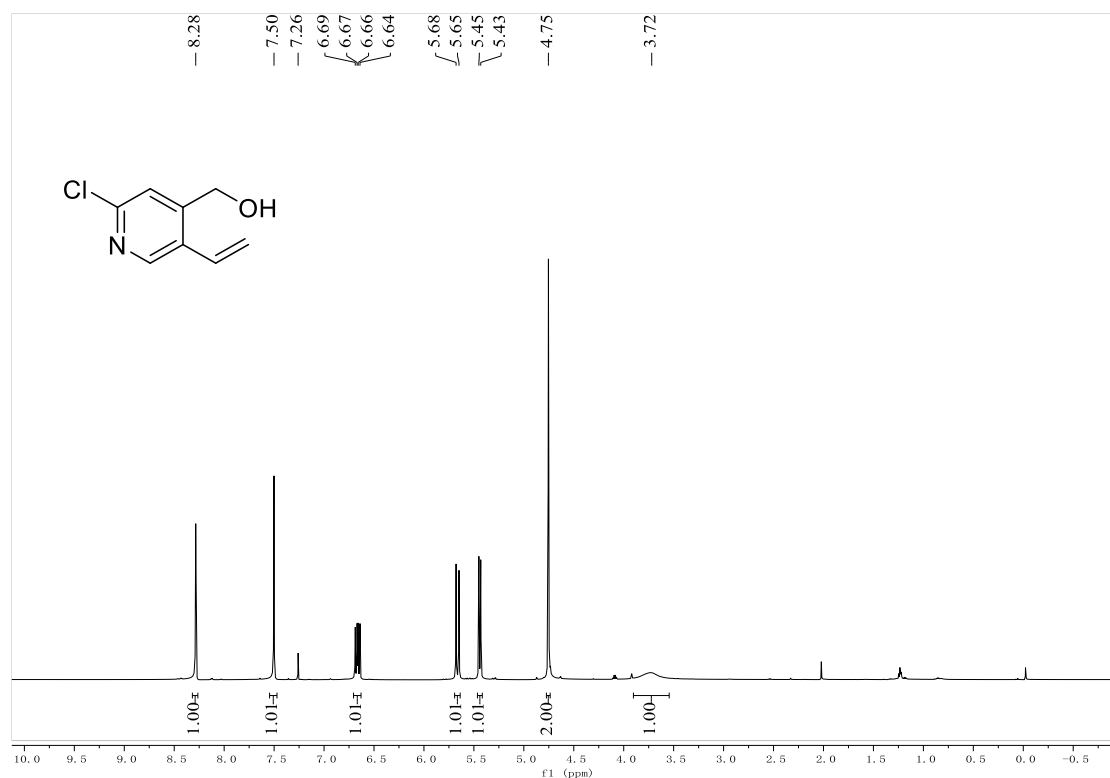

Figure S5 <sup>1</sup>H NMR Spectra of compound **11** (600 MHz, CDCl<sub>3</sub>)

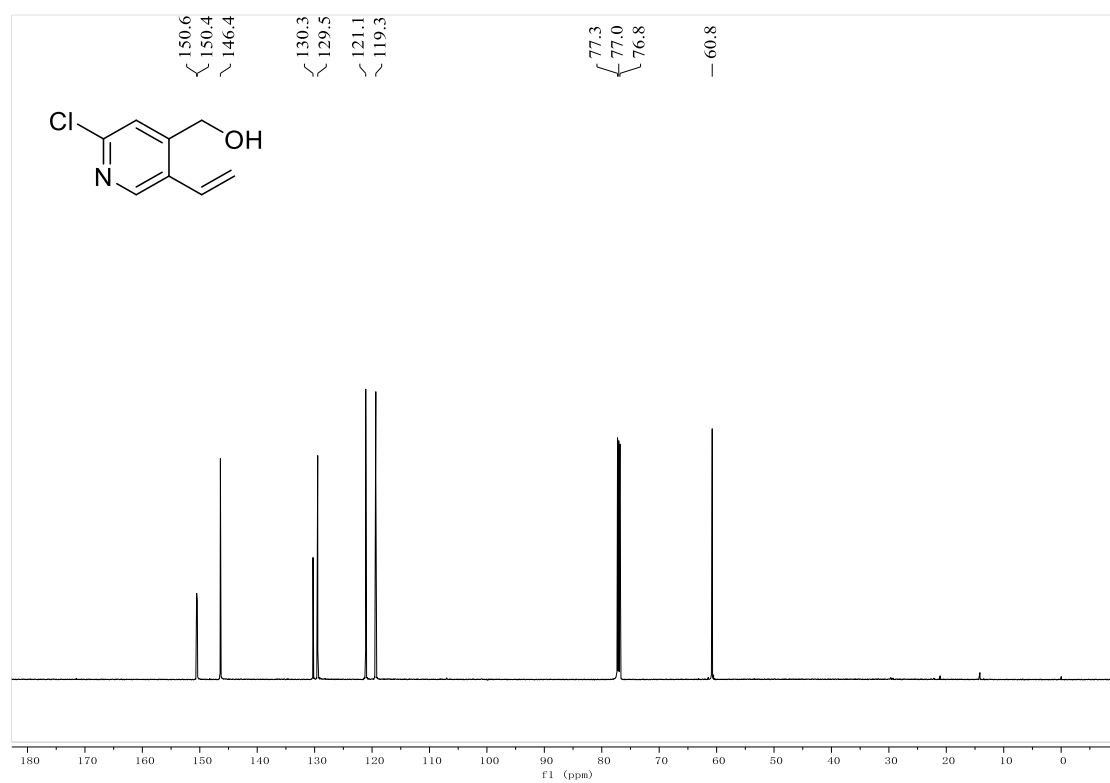

Figure S6 <sup>13</sup>C NMR Spectra of compound **11** (150 MHz, CDCl<sub>3</sub>)

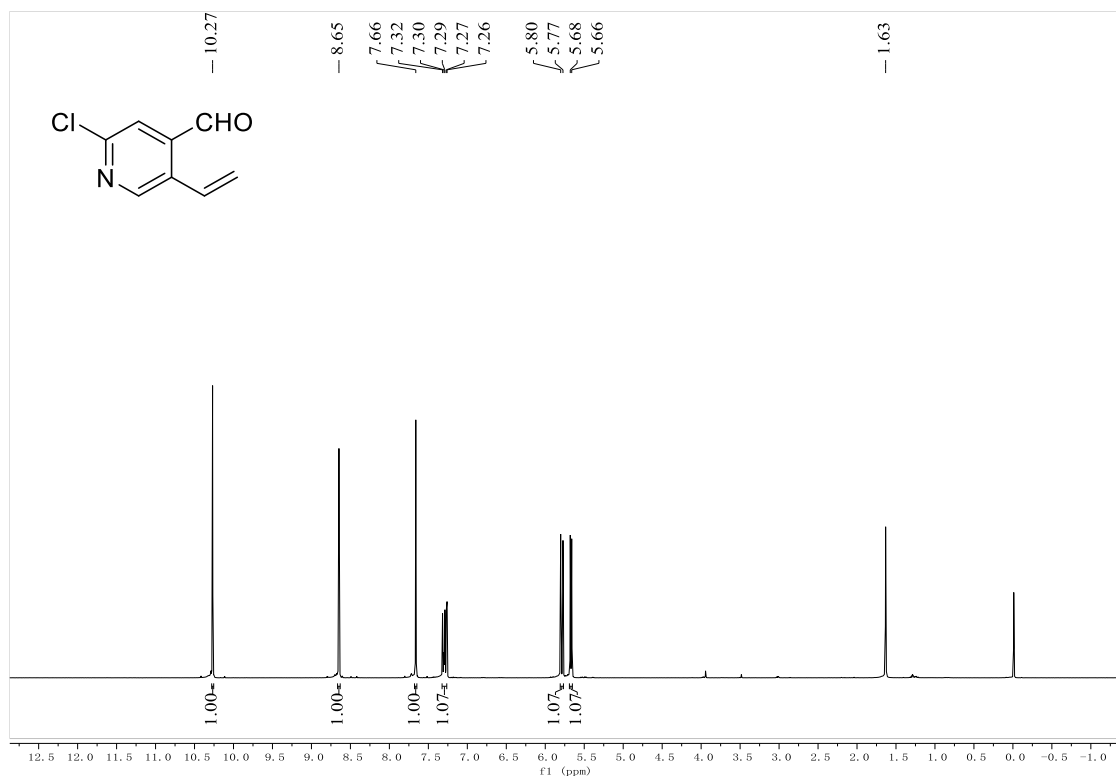

Figure S7 <sup>1</sup>H NMR Spectra of compound **7** (600 MHz, CDCl<sub>3</sub>)

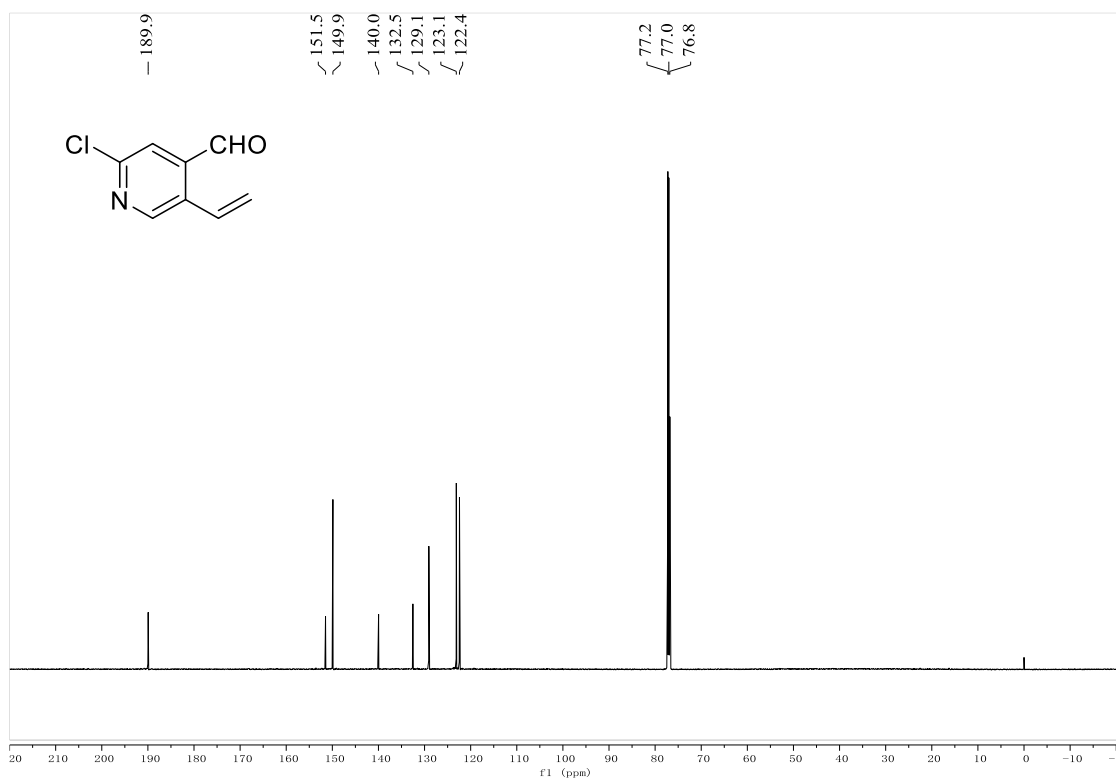

Figure S8 <sup>13</sup>C NMR Spectra of compound **7** (150 MHz, CDCl<sub>3</sub>)

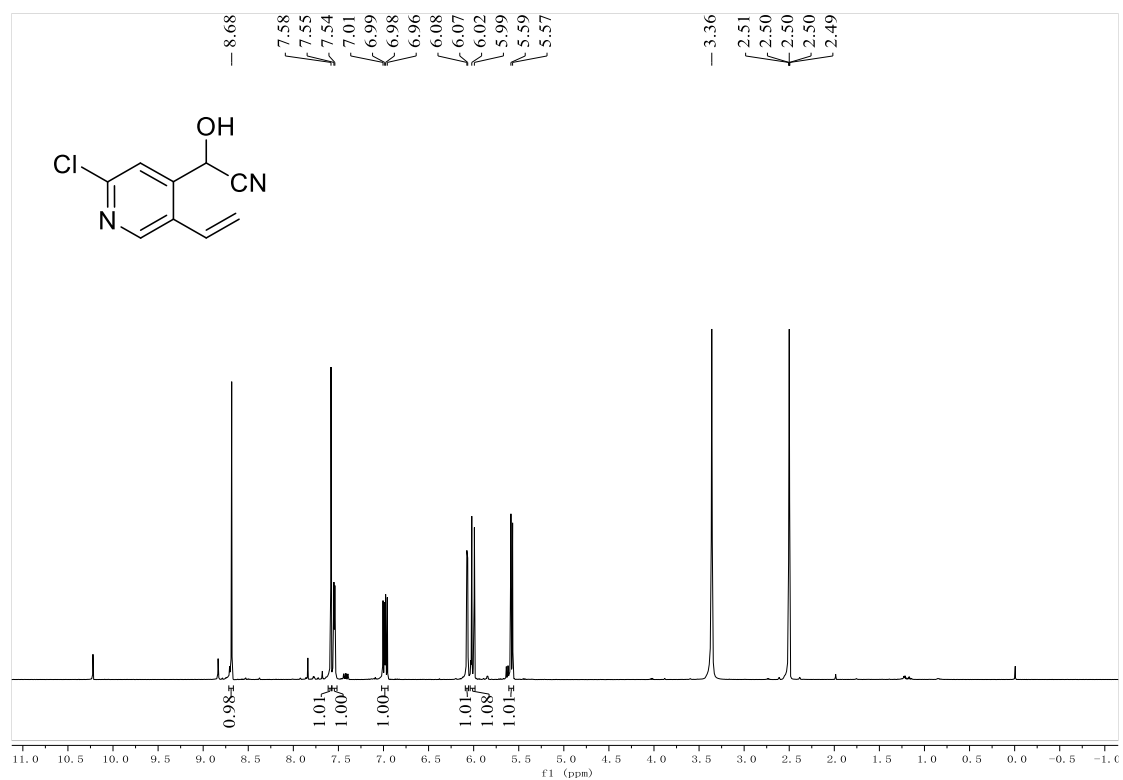

Figure S9  $^1\text{H NMR}$  Spectra of compound **6** (600 MHz,  $\text{DMSO-}d_6$ )

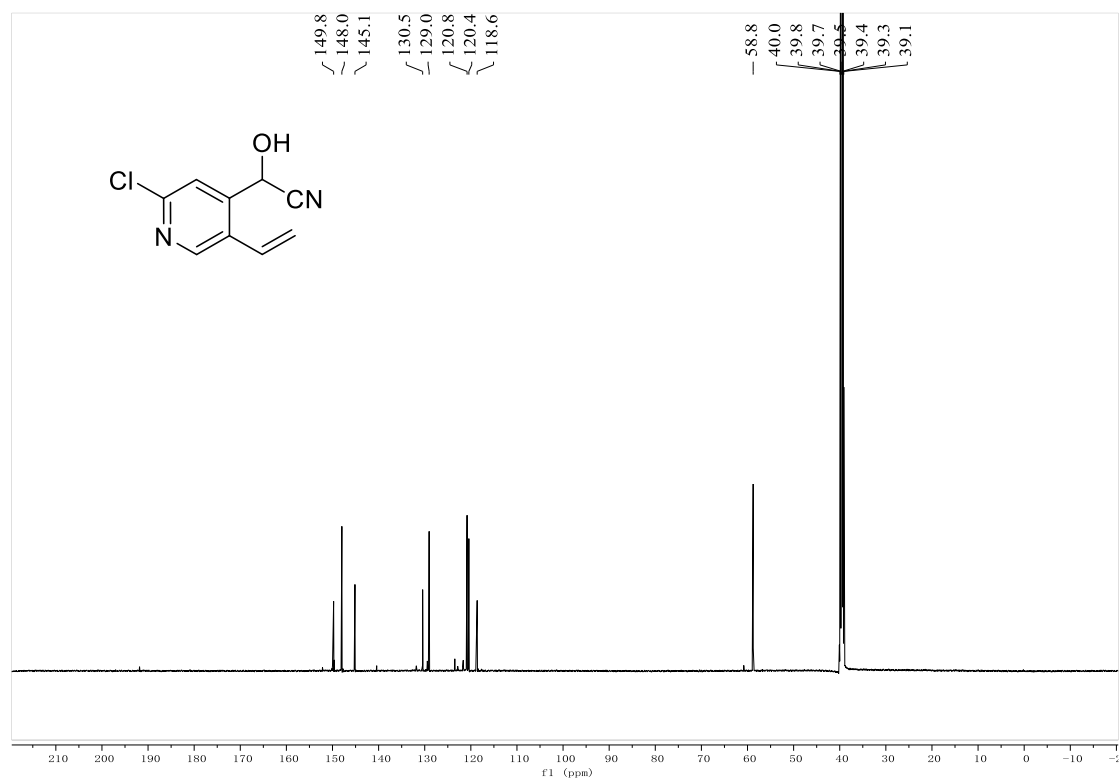

Figure S10  $^{13}\text{C NMR}$  Spectra of compound **6** (150 MHz,  $\text{DMSO-}d_6$ )

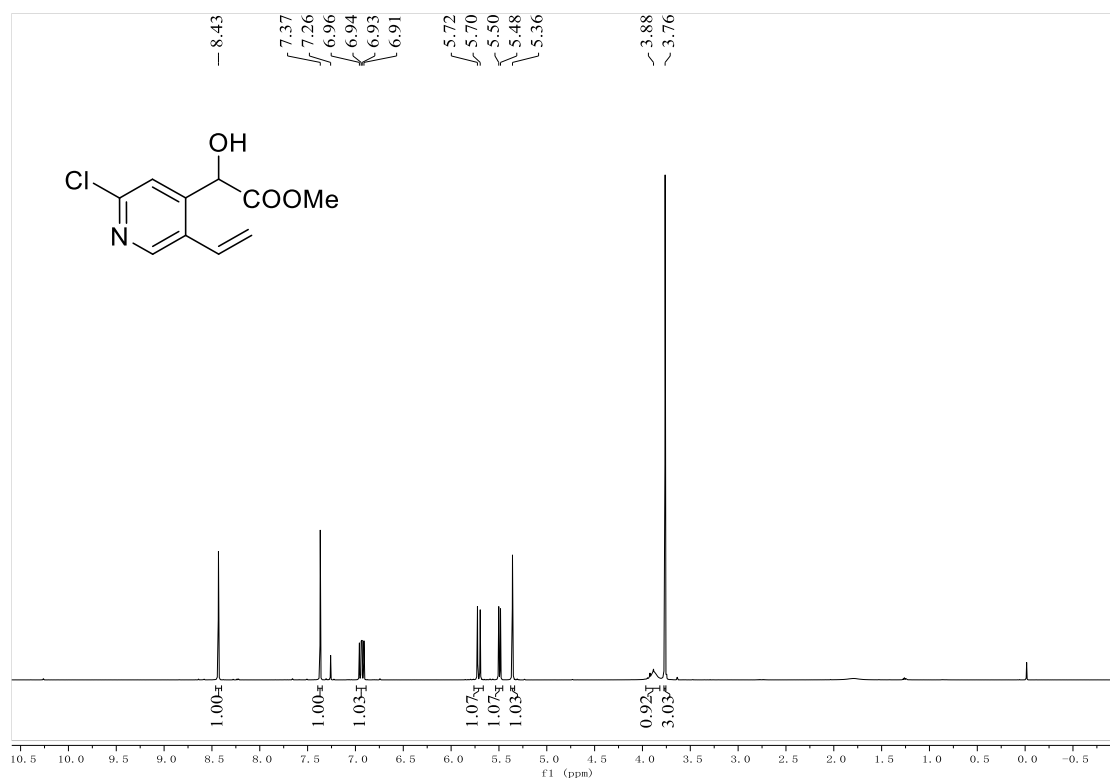

Figure S11  $^1\text{H}$  NMR Spectra of compound **13** (600 MHz,  $\text{CDCl}_3$ )

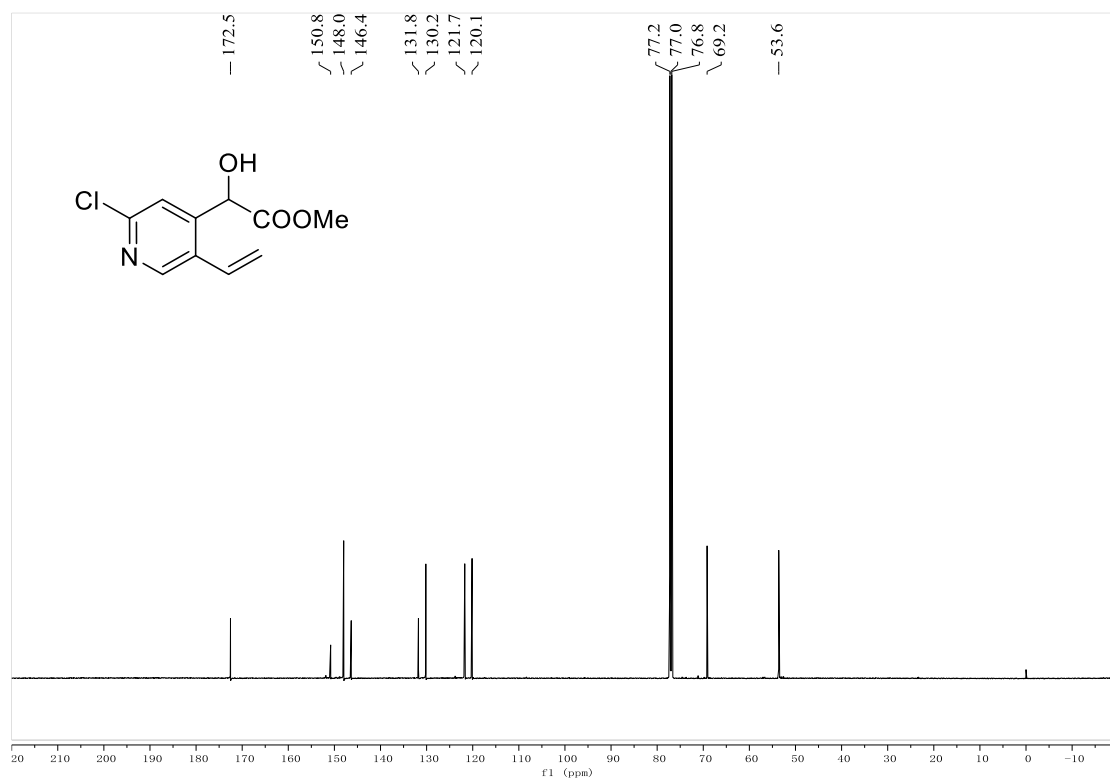

Figure S12  $^{13}\text{C}$  NMR Spectra of compound **13** (150 MHz,  $\text{CDCl}_3$ )

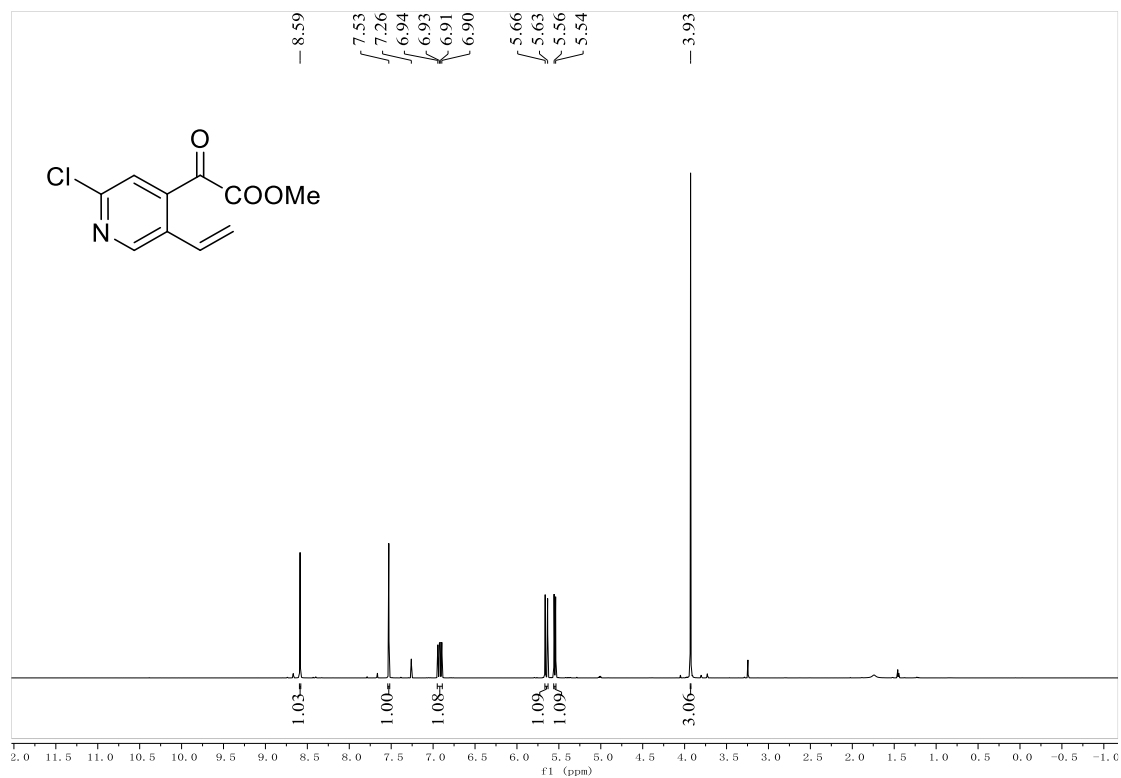

Figure S13 <sup>1</sup>H NMR Spectra of compound **5** (600 MHz, CDCl<sub>3</sub>)

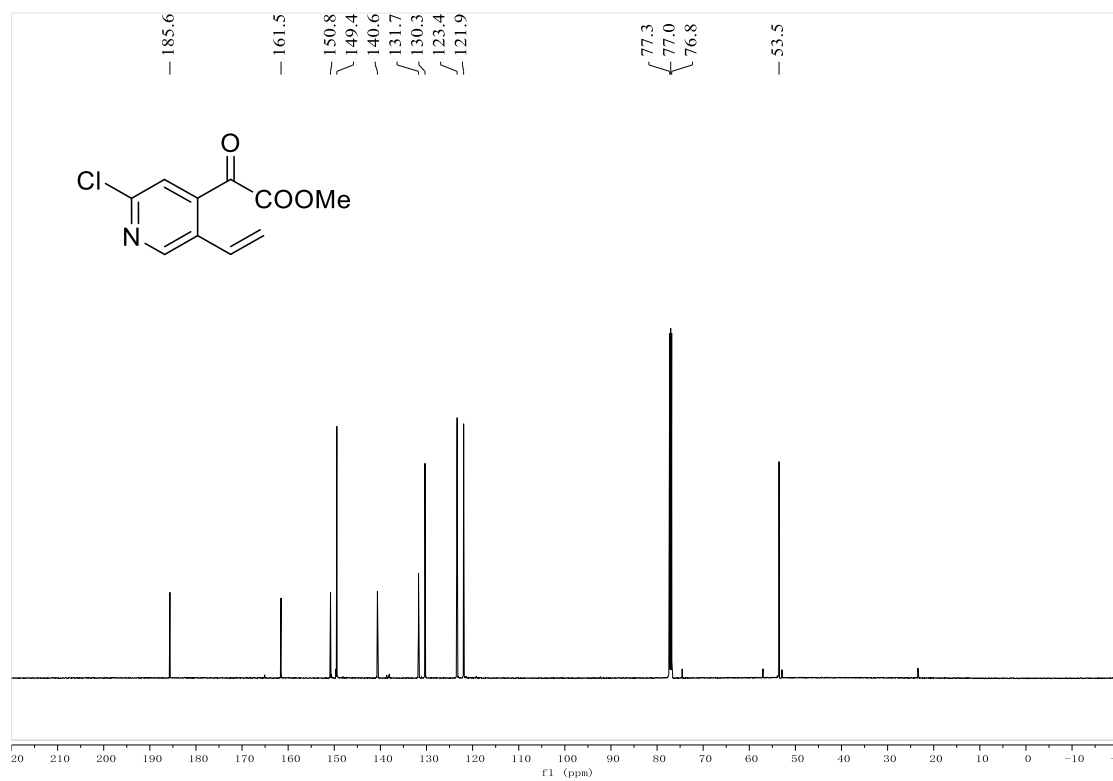

Figure S14 <sup>13</sup>C NMR Spectra of compound **5** (150 MHz, CDCl<sub>3</sub>)



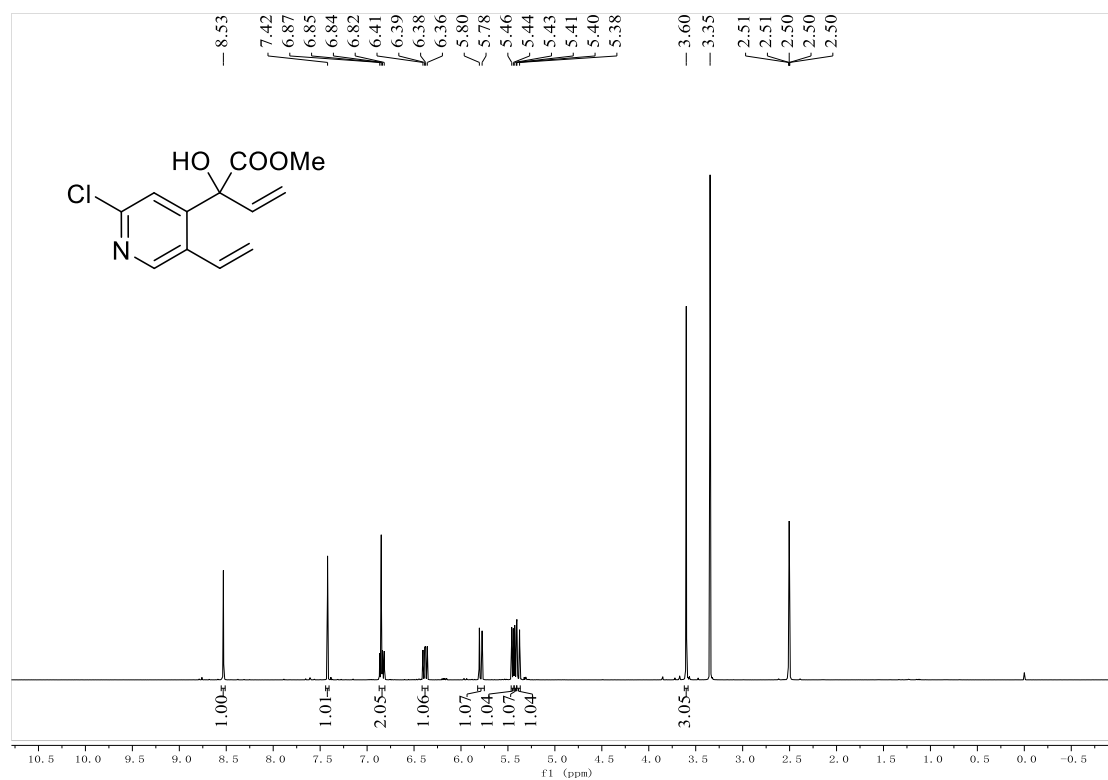

Figure S15 <sup>1</sup>H NMR Spectra of compound **5b** (600 MHz, DMSO-*d*<sub>6</sub>)

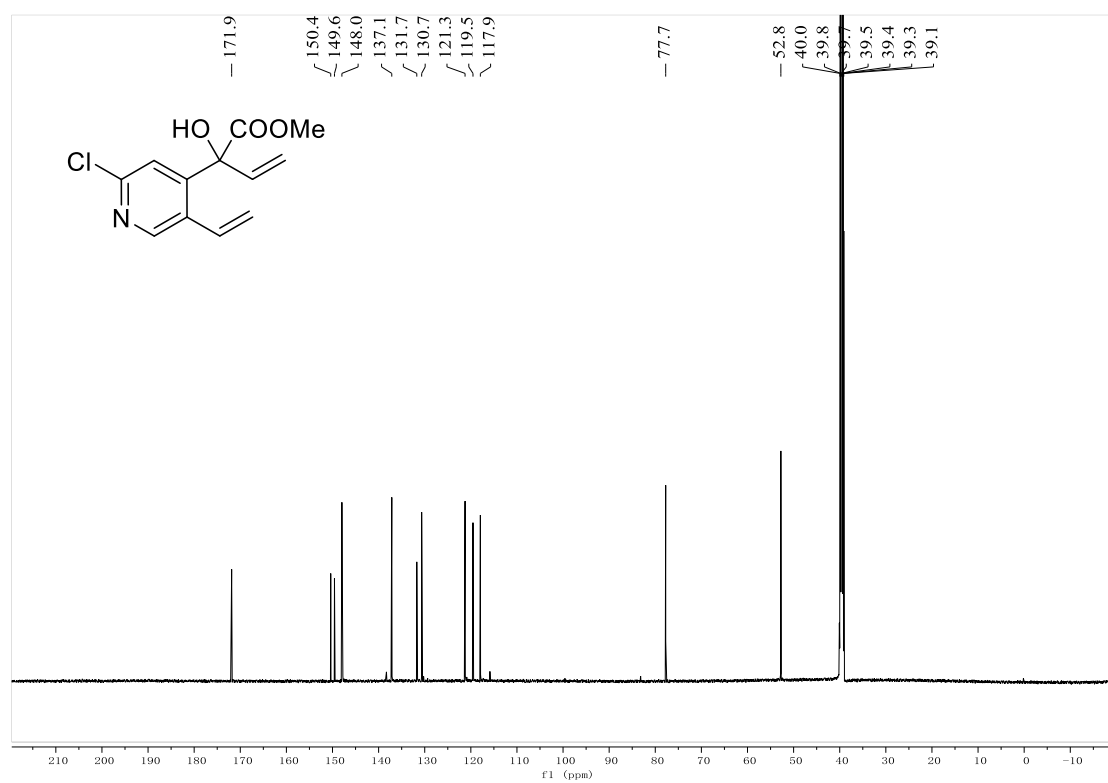

Figure S16 <sup>13</sup>C NMR Spectra of compound **5b** (150 MHz, DMSO-*d*<sub>6</sub>)

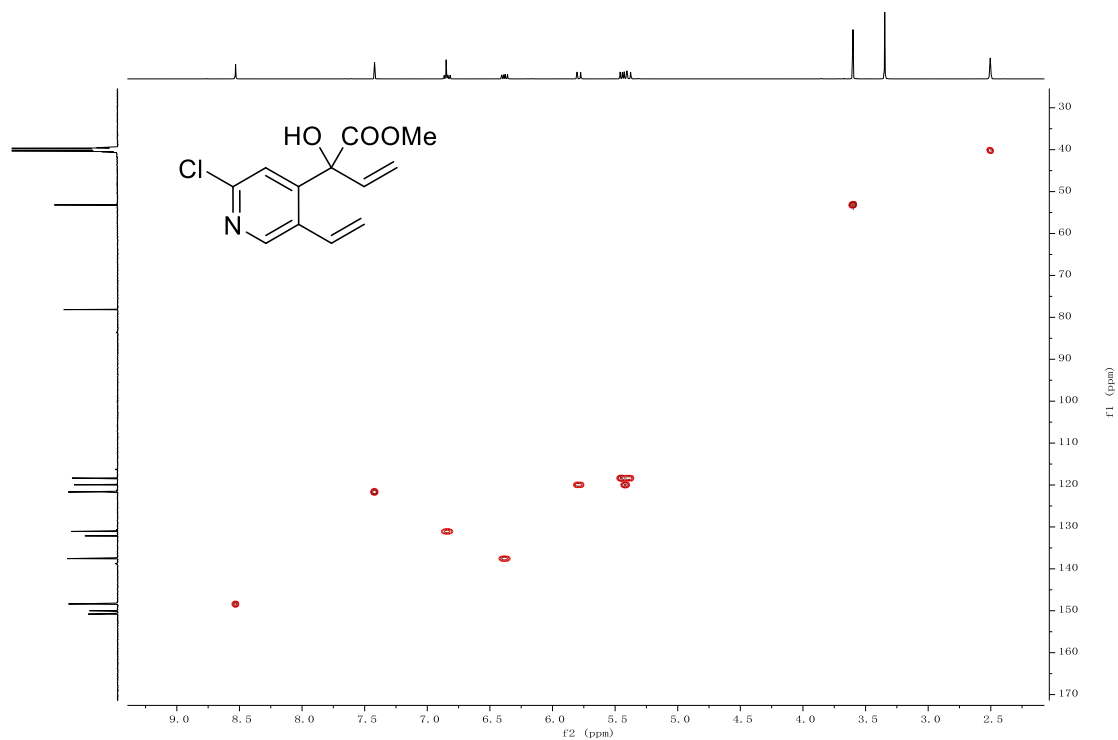

Figure S17 HSQC Spectra of compound **4** (150 MHz, DMSO-*d*<sub>6</sub>)

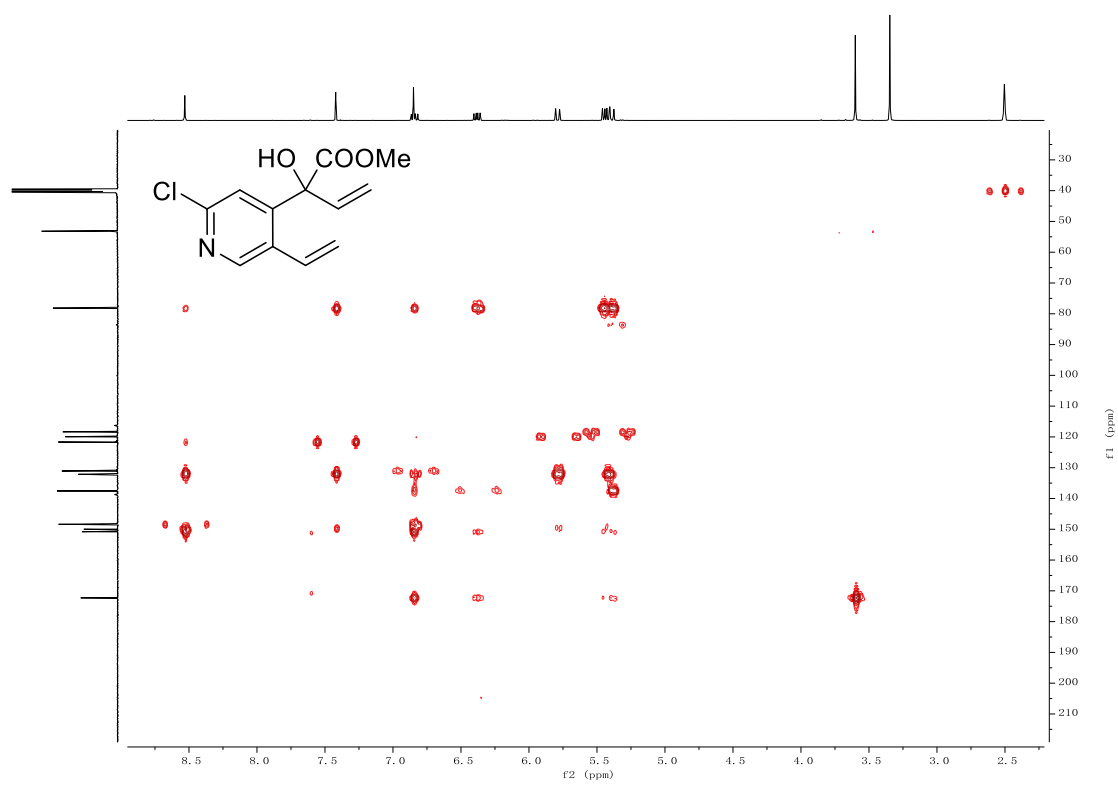

Figure S18 HMBC Spectra of compound **4** (150 MHz, DMSO-*d*<sub>6</sub>)

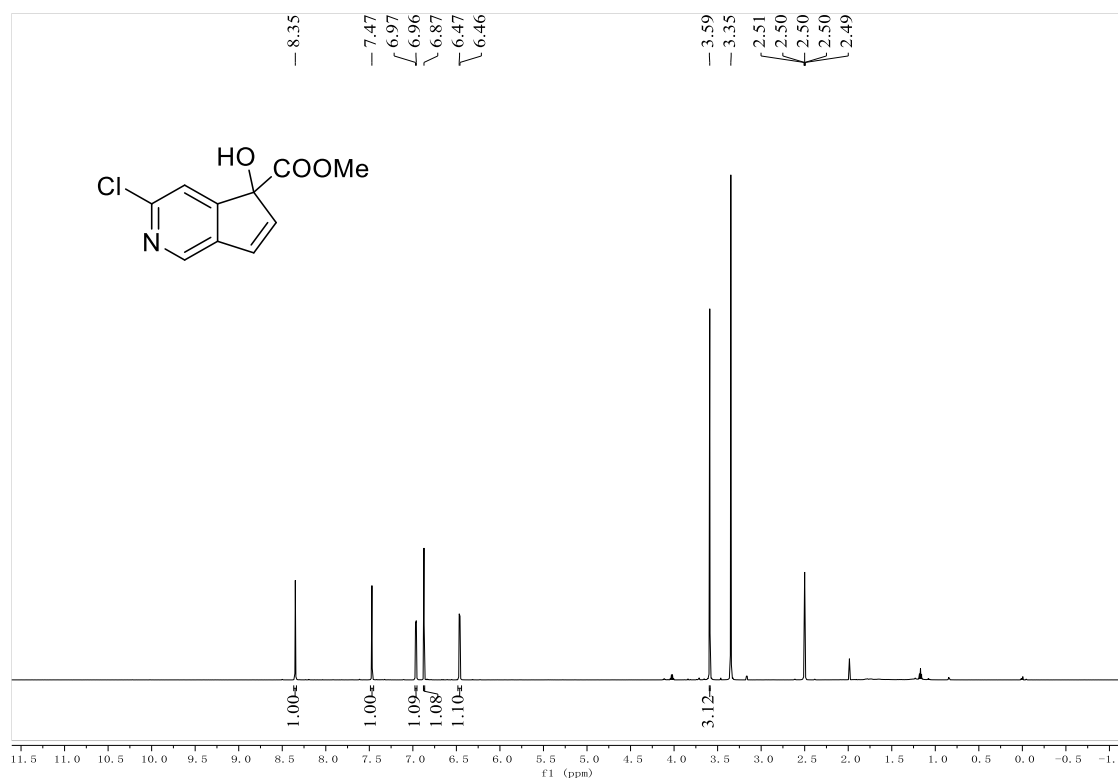

Figure S19 <sup>1</sup>H NMR Spectra of compound **18** (600 MHz, DMSO-*d*<sub>6</sub>)

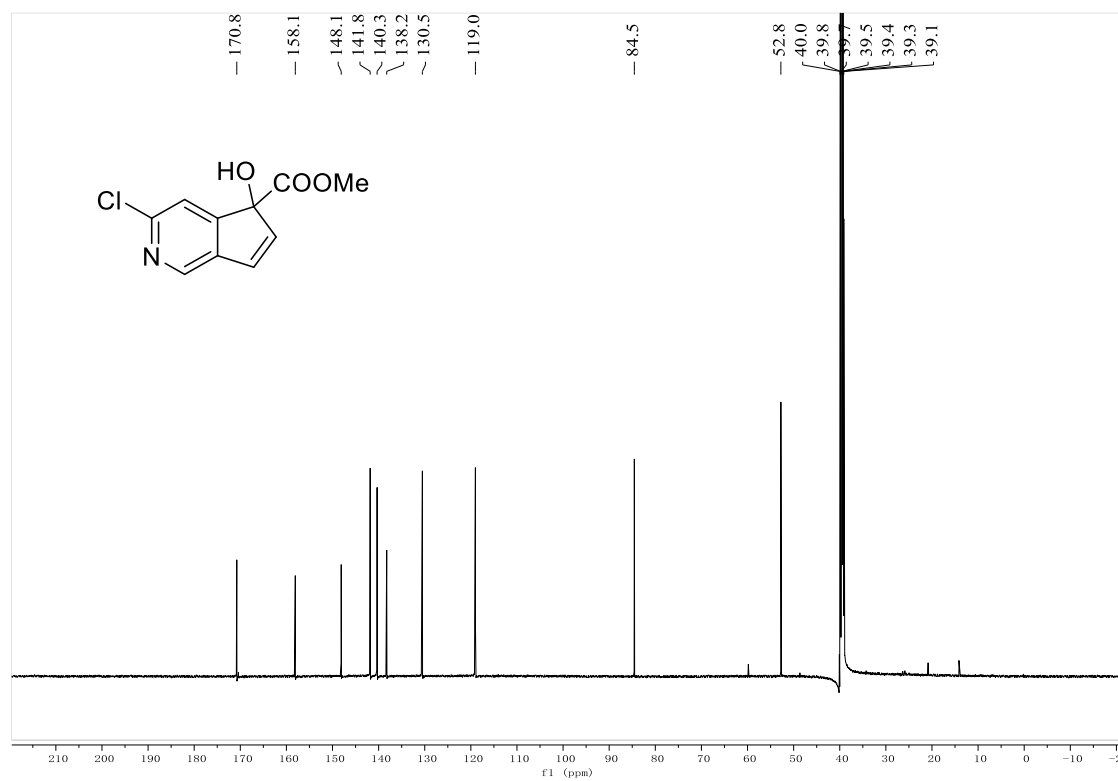

Figure S20 <sup>13</sup>C NMR Spectra of compound **18** (150 MHz, DMSO-*d*<sub>6</sub>)

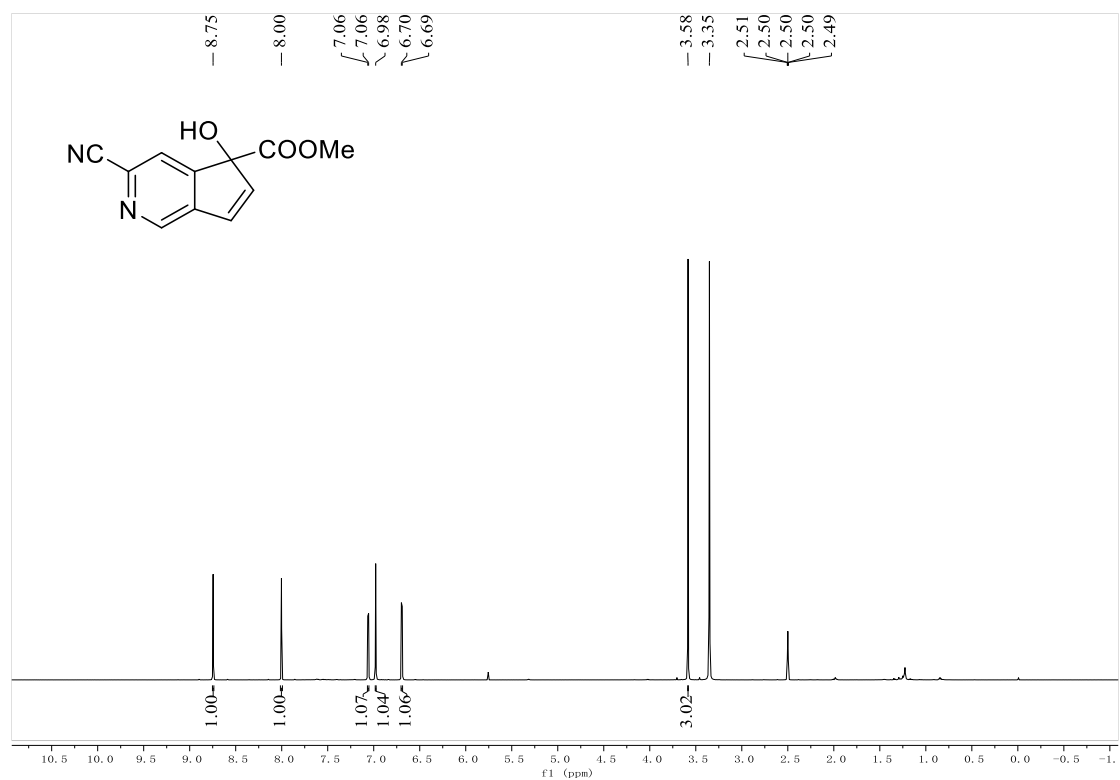

Figure S21 <sup>1</sup>H NMR Spectra of compound **19** (600 MHz, DMSO-*d*<sub>6</sub>)

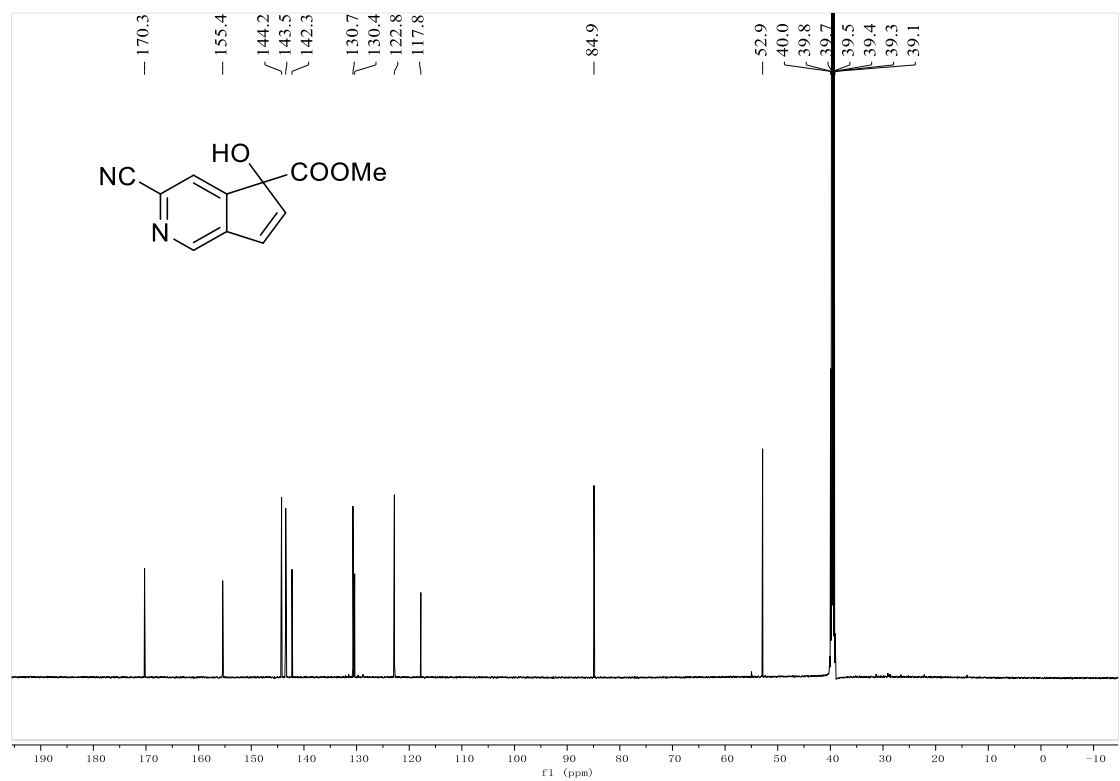

Figure S22 <sup>13</sup>C NMR Spectra of compound **19** (150 MHz, DMSO-*d*<sub>6</sub>)

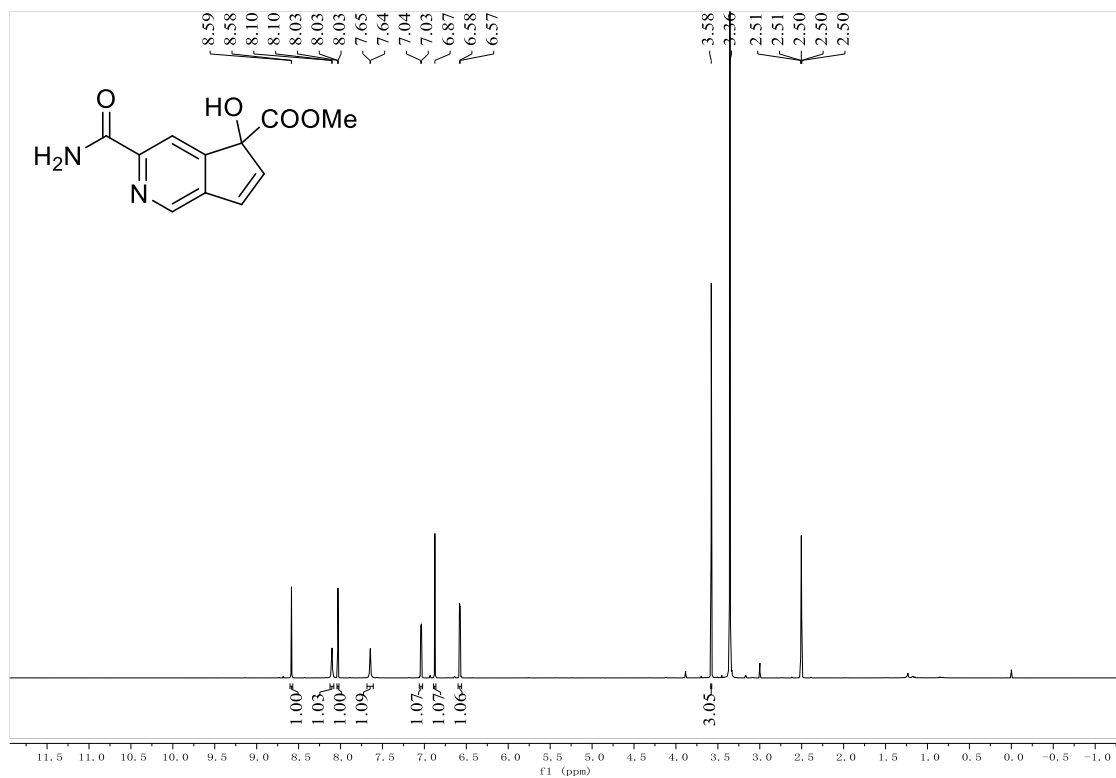

Figure S23 <sup>1</sup>H NMR Spectra of amycolasporin C (3) (600 MHz, DMSO-*d*<sub>6</sub>)

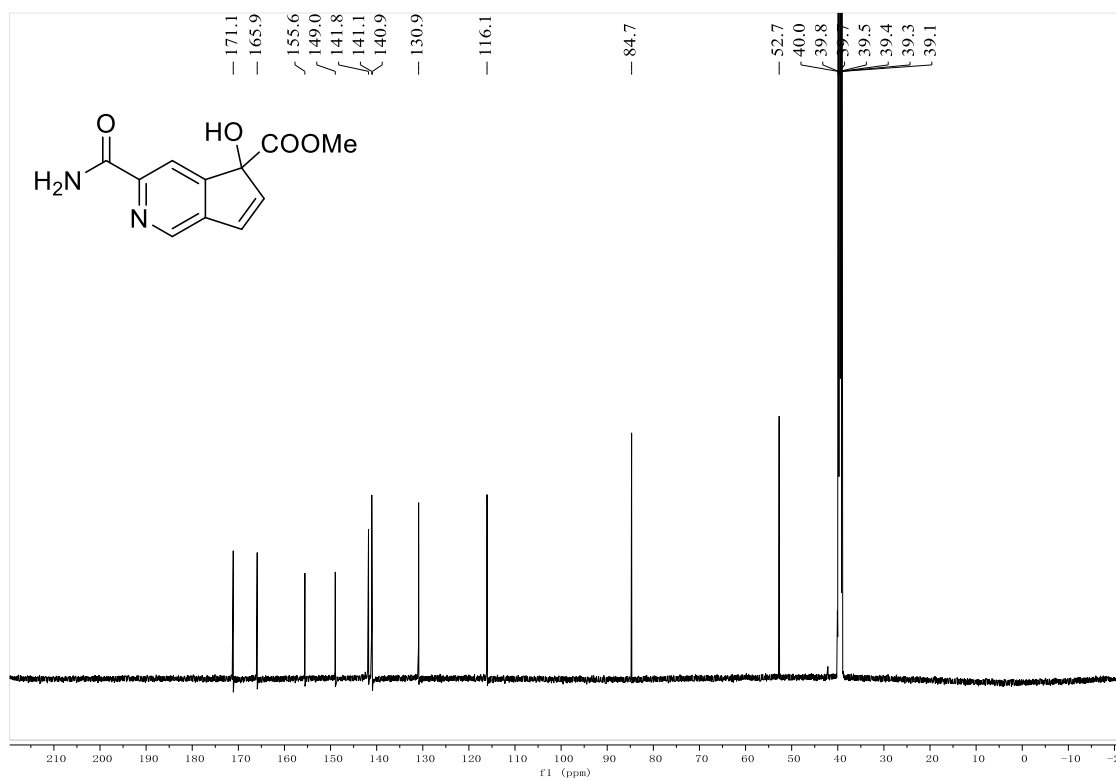

Figure S24 <sup>13</sup>C NMR Spectra of amycolasporin C (3) (150 MHz, DMSO-*d*<sub>6</sub>)

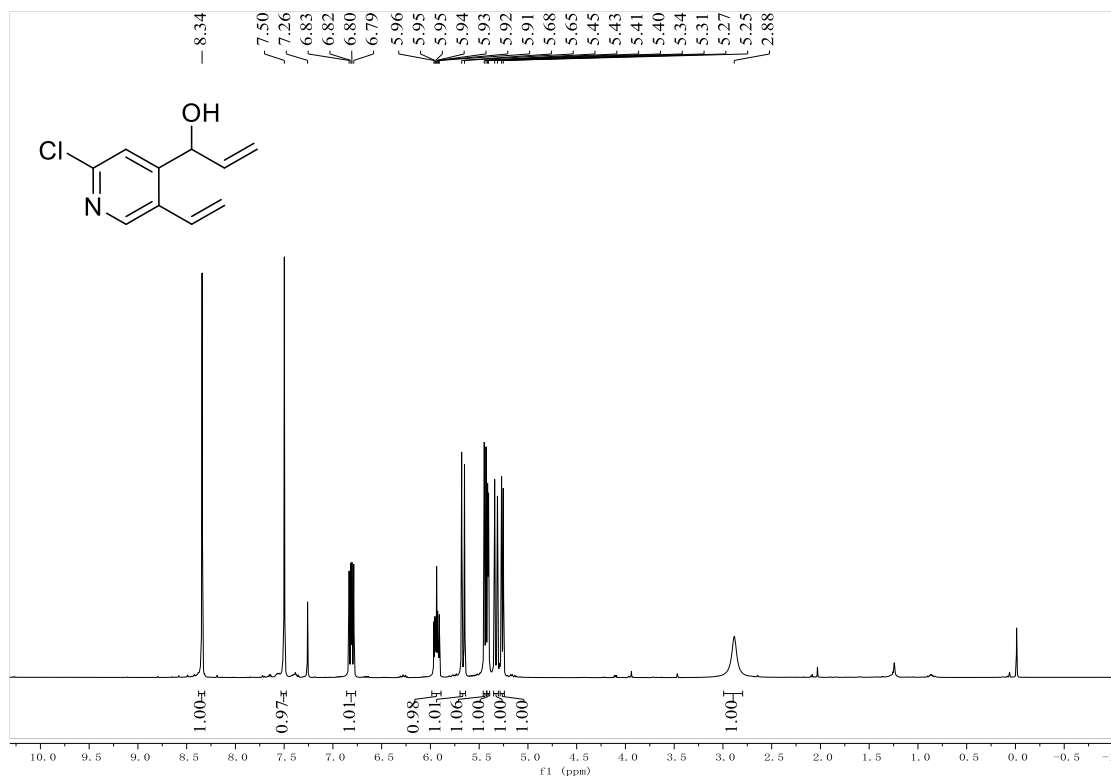

Figure S25 <sup>1</sup>H NMR Spectra of compound **20** (600 MHz, CDCl<sub>3</sub>)

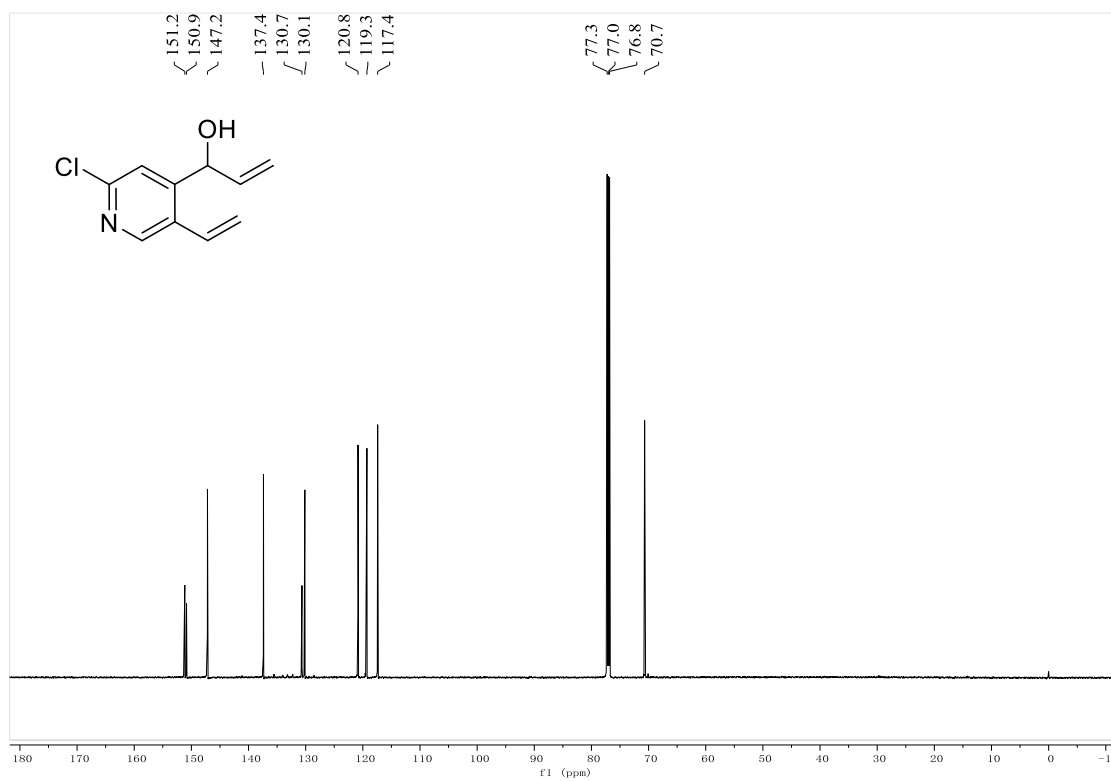

Figure S26 <sup>13</sup>C NMR Spectra of compound **20** (150 MHz, CDCl<sub>3</sub>)

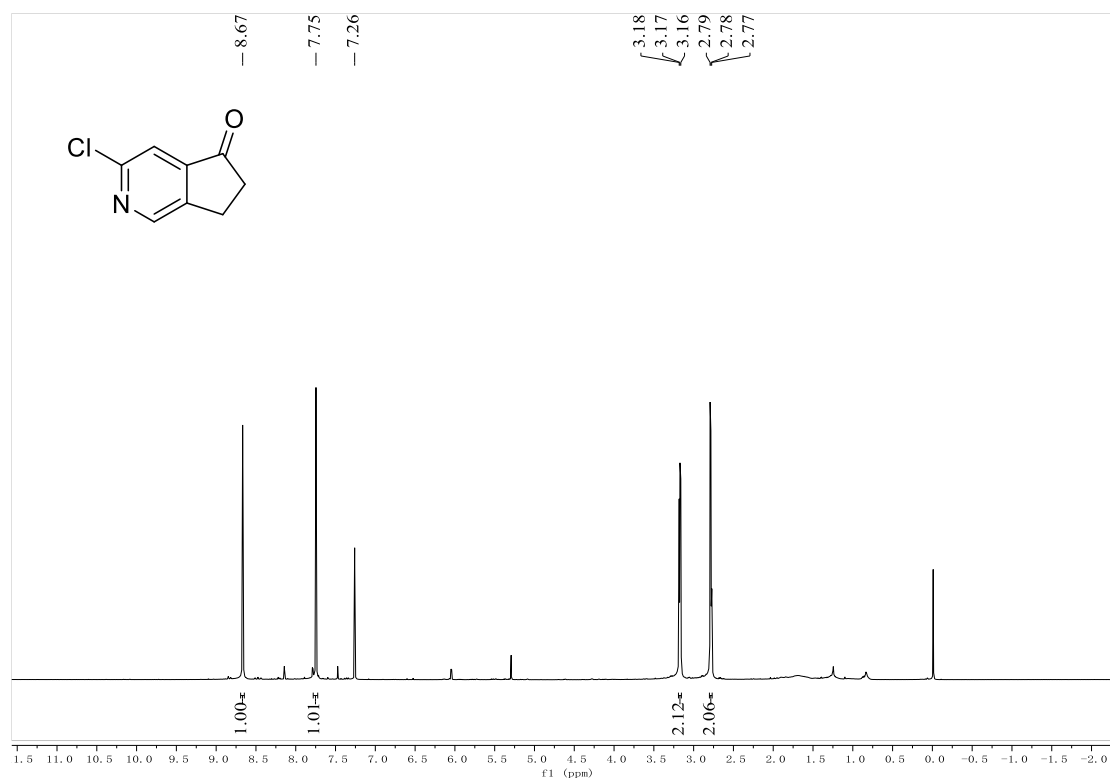

Figure S27 <sup>1</sup>H NMR Spectra of compound **21** (600 MHz, CDCl<sub>3</sub>)

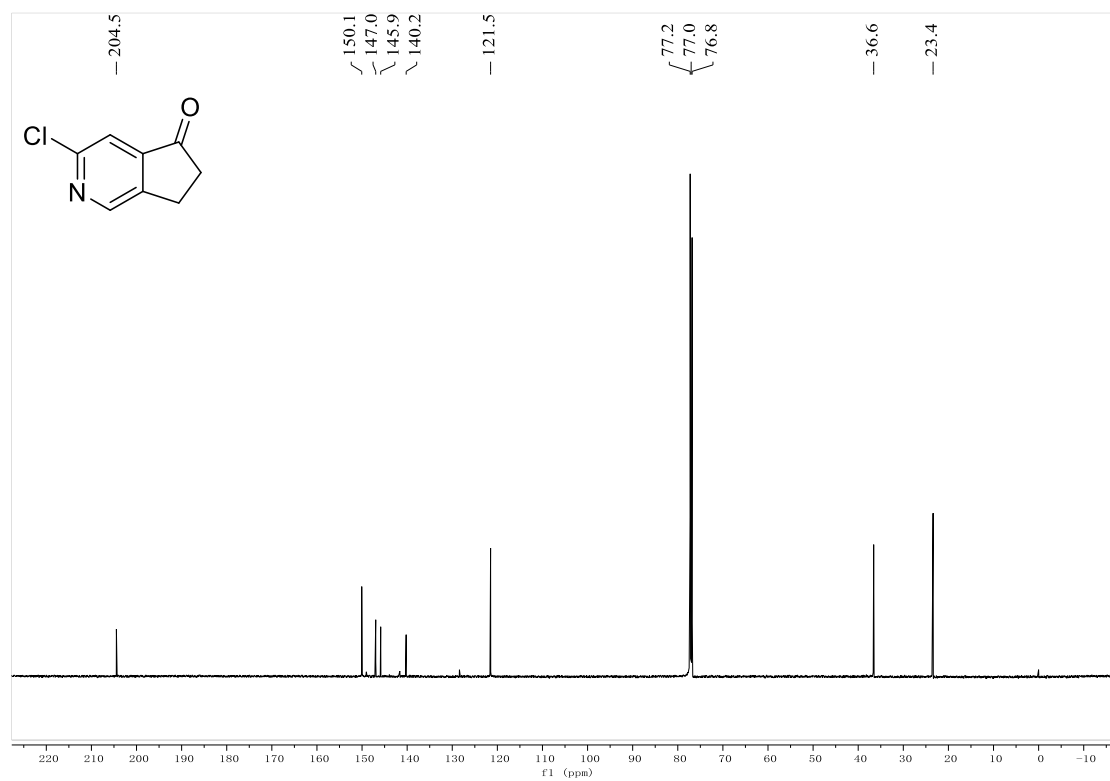

Figure S28 <sup>13</sup>C NMR Spectra of compound **21** (150 MHz, CDCl<sub>3</sub>)

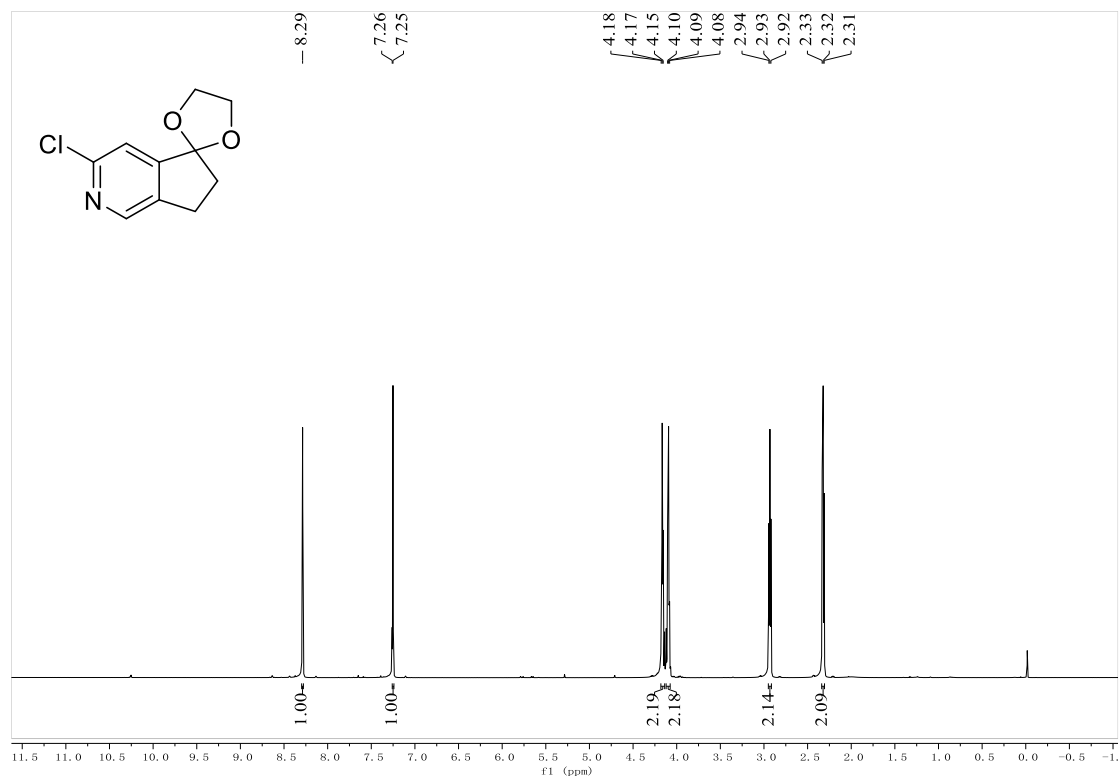

Figure S29 <sup>1</sup>H NMR Spectra of compound **22** (600 MHz, CDCl<sub>3</sub>)

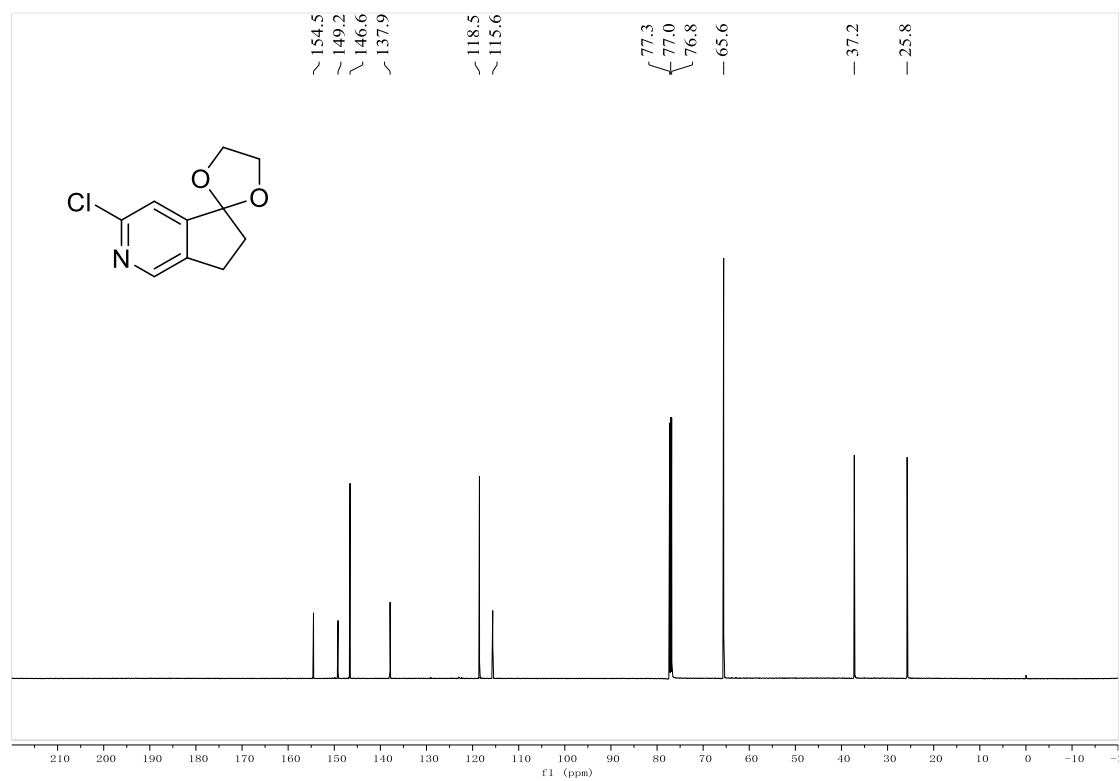

Figure S30 <sup>13</sup>C NMR Spectra of compound **22** (150 MHz, CDCl<sub>3</sub>)



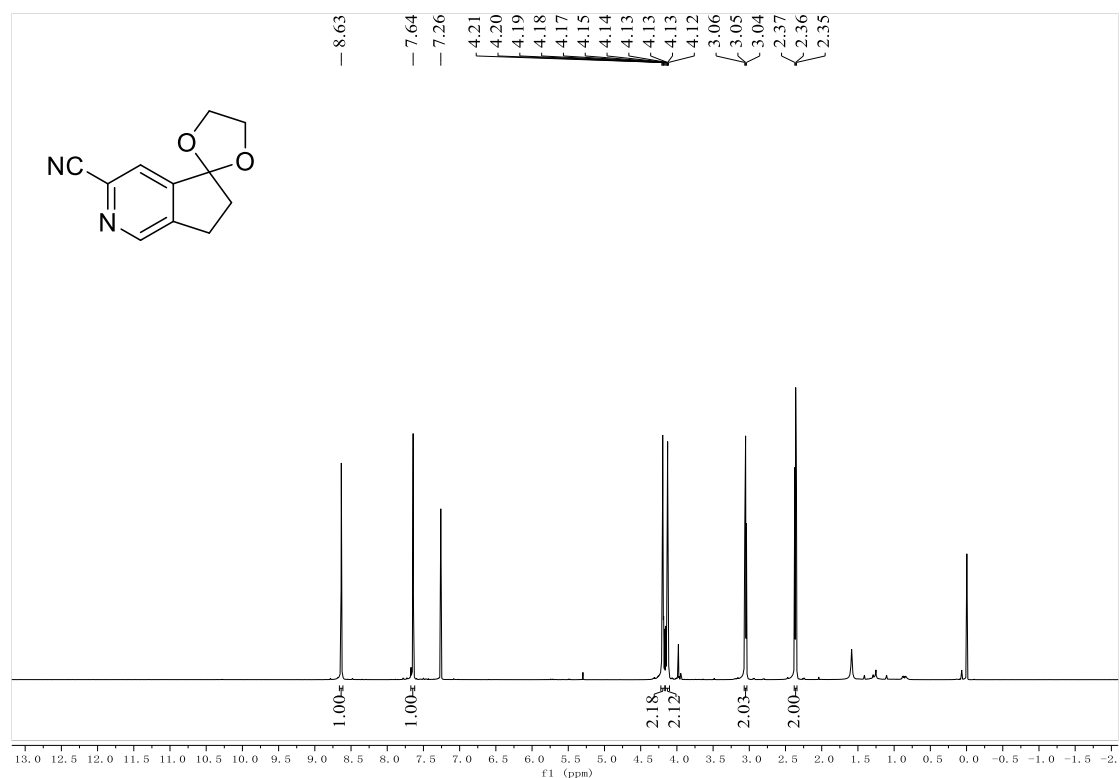

Figure S31 <sup>1</sup>H NMR Spectra of compound **23** (600 MHz, CDCl<sub>3</sub>)

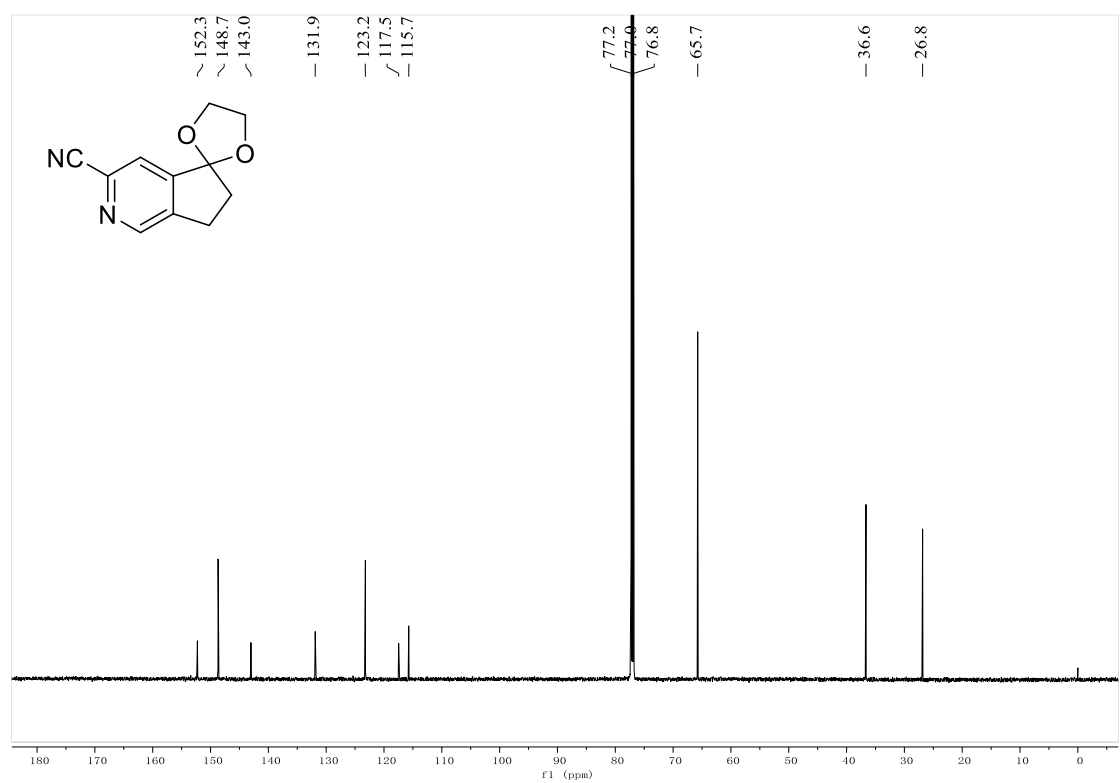

Figure S32 <sup>13</sup>C NMR Spectra of compound **23** (150 MHz, CDCl<sub>3</sub>)

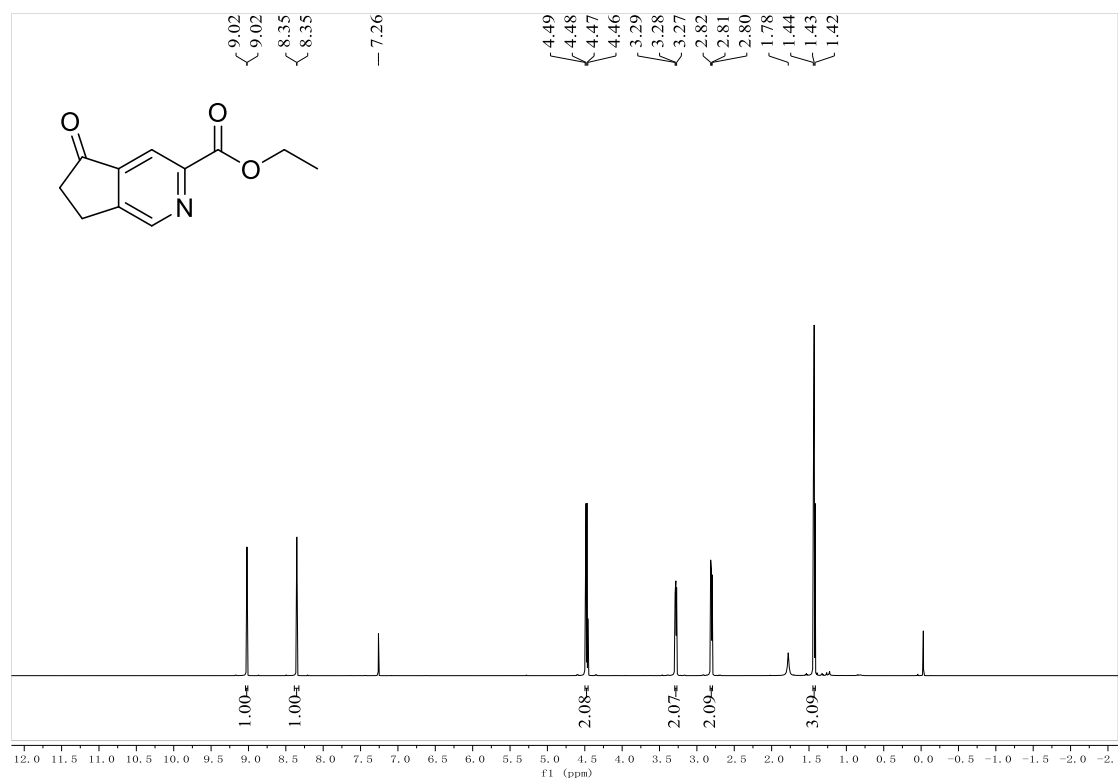

Figure S33 <sup>1</sup>H NMR Spectra of compound **24** (600 MHz, CDCl<sub>3</sub>)

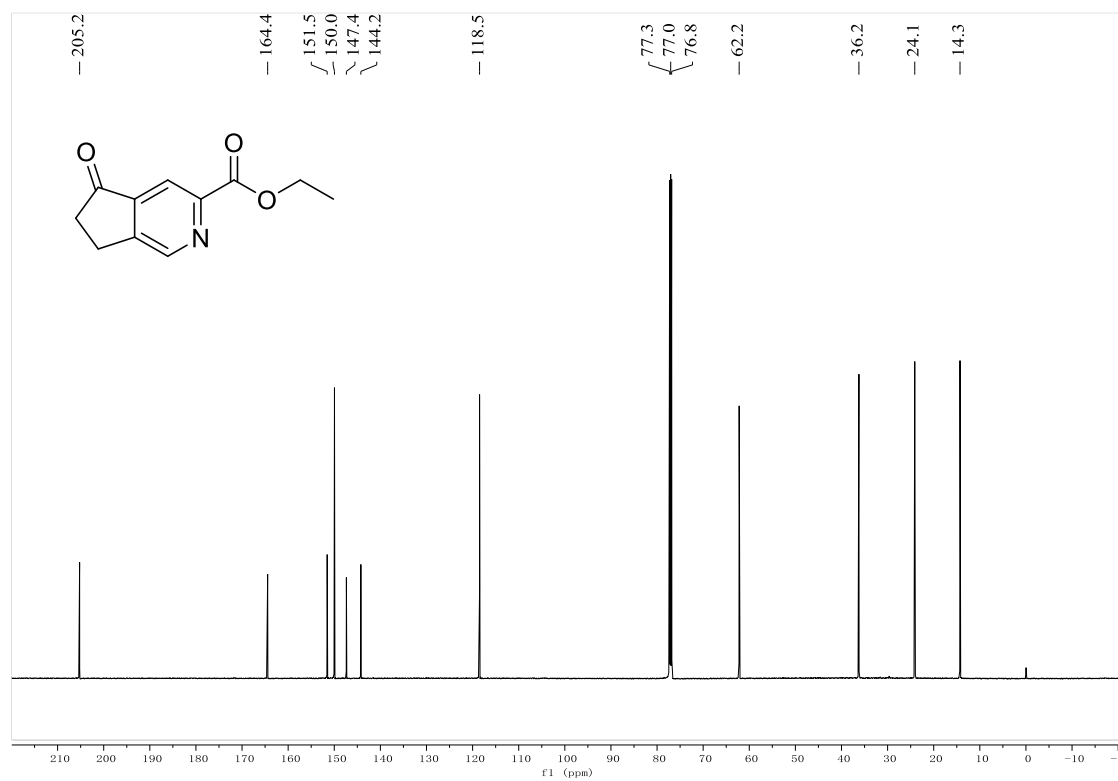

Figure S34 <sup>13</sup>C NMR Spectra of compound **24** (150 MHz, CDCl<sub>3</sub>)

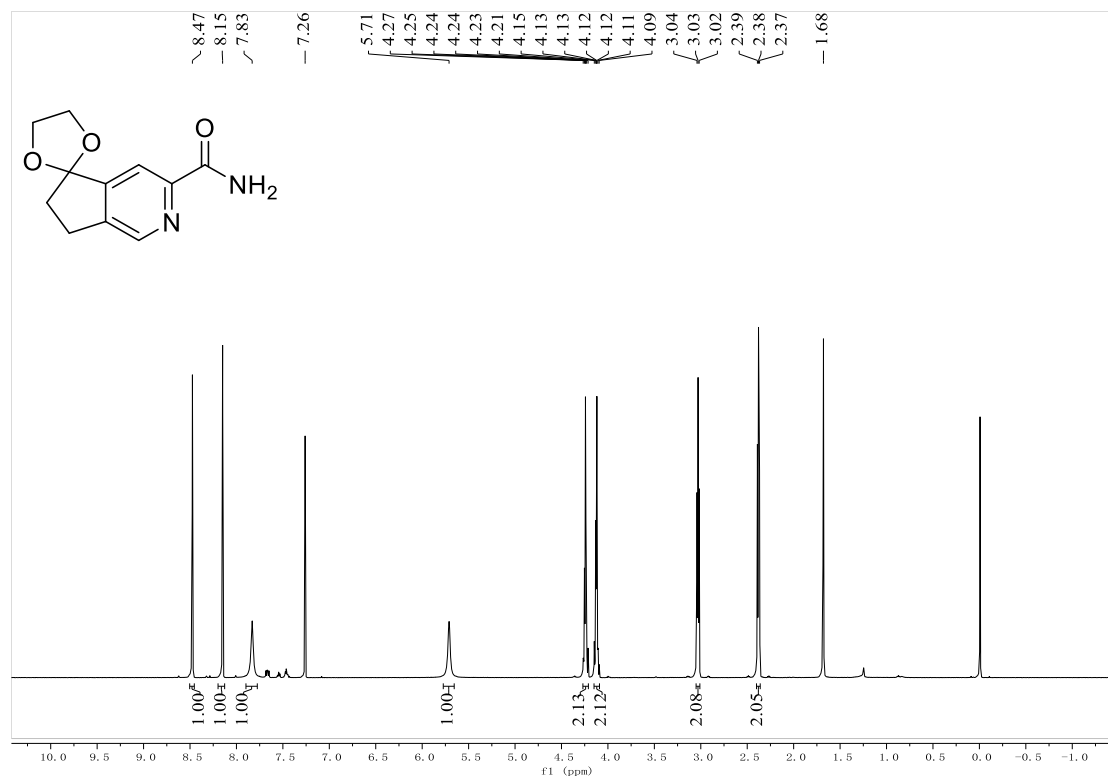

Figure S35 <sup>1</sup>H NMR Spectra of compound **25** (600 MHz, CDCl<sub>3</sub>)

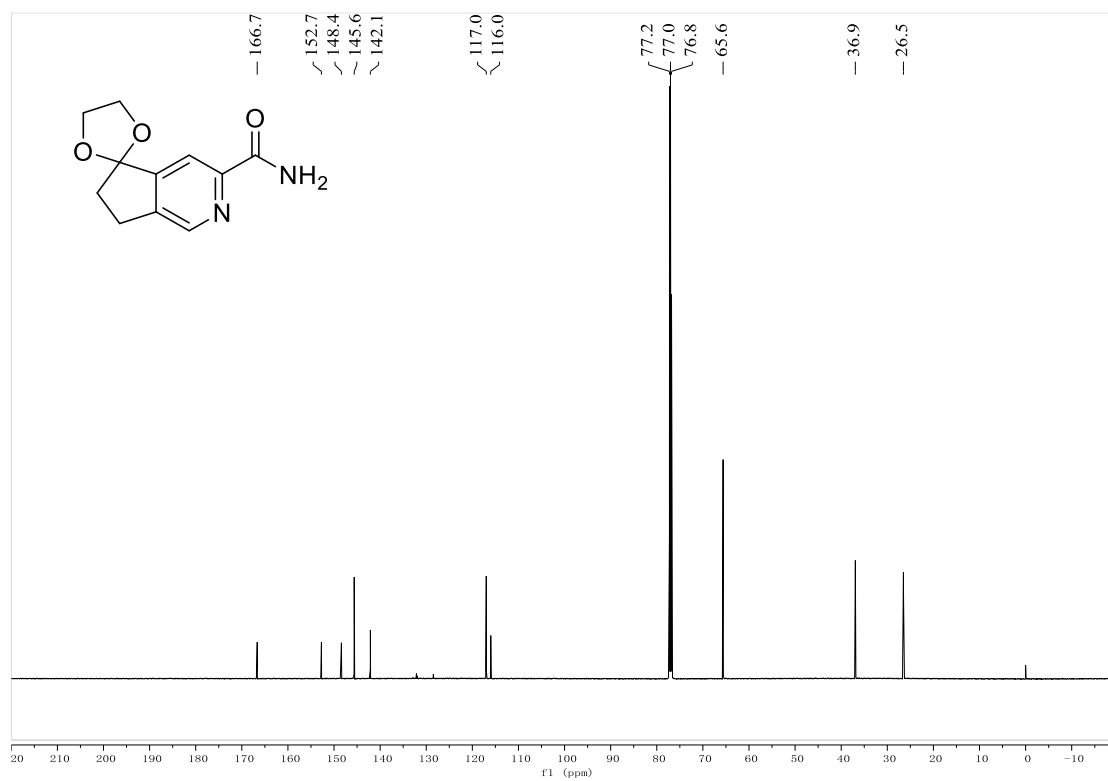

Figure S36 <sup>13</sup>C NMR Spectra of compound **25** (150 MHz, CDCl<sub>3</sub>)

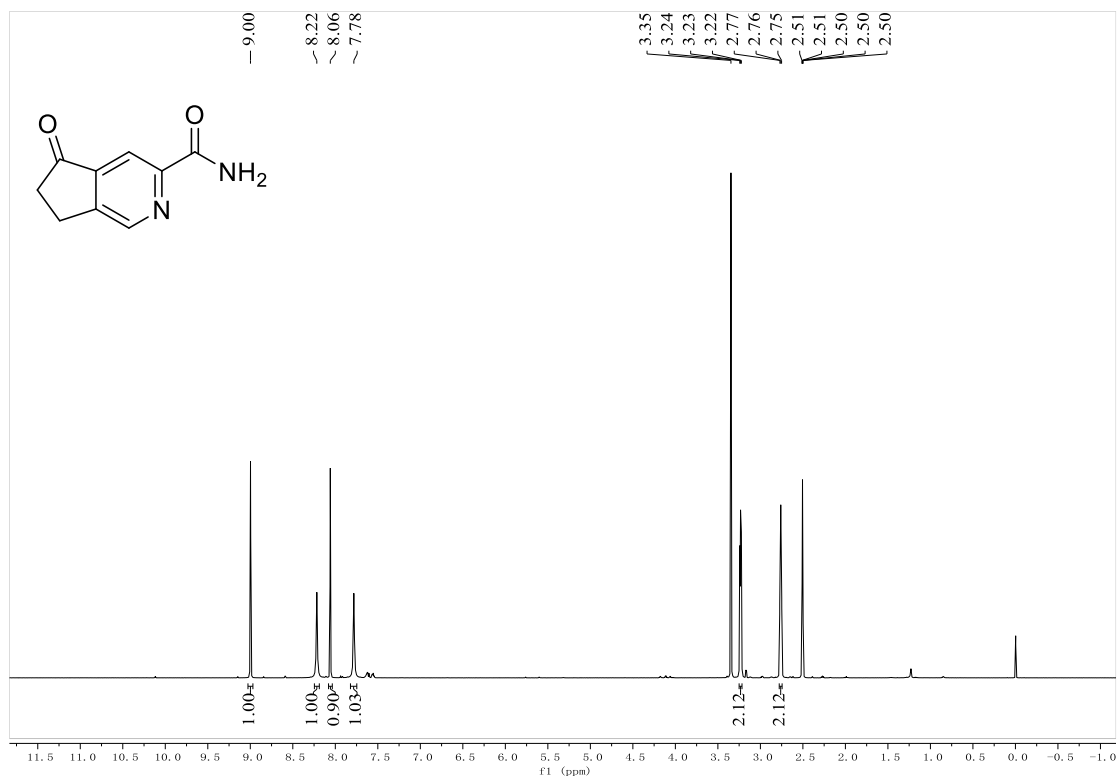

Figure S37  $^1\text{H}$  NMR Spectra of amycolasporin A (**1**) (600 MHz,  $\text{DMSO-}d_6$ )

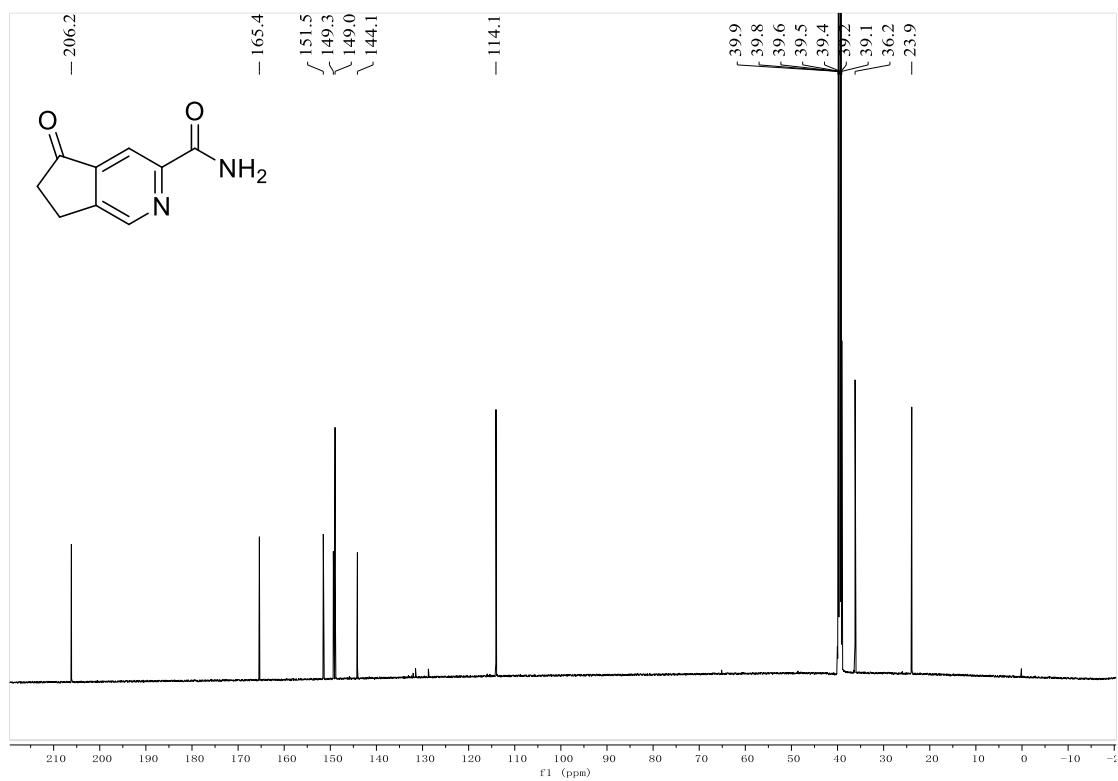

Figure S38  $^{13}\text{C}$  NMR Spectra of amycolasporin A (**1**) (150 MHz,  $\text{DMSO-}d_6$ )

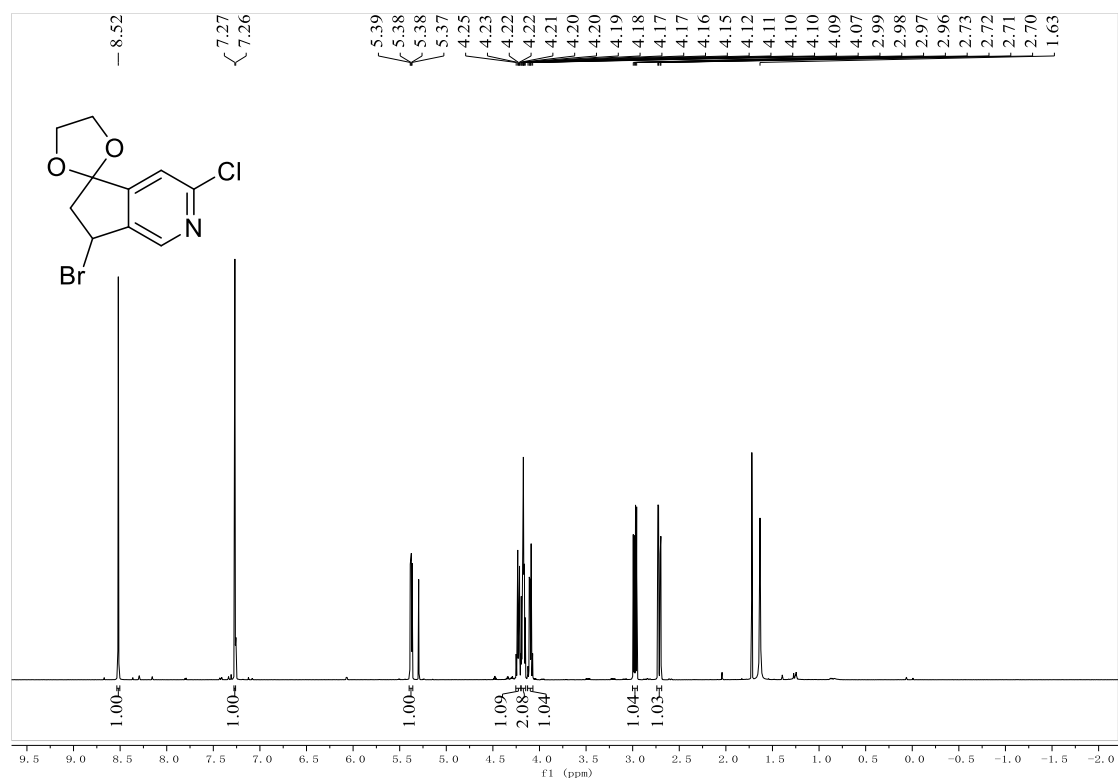

Figure S39  $^1\text{H}$  NMR Spectra of compound **26** (600 MHz,  $\text{CDCl}_3$ )

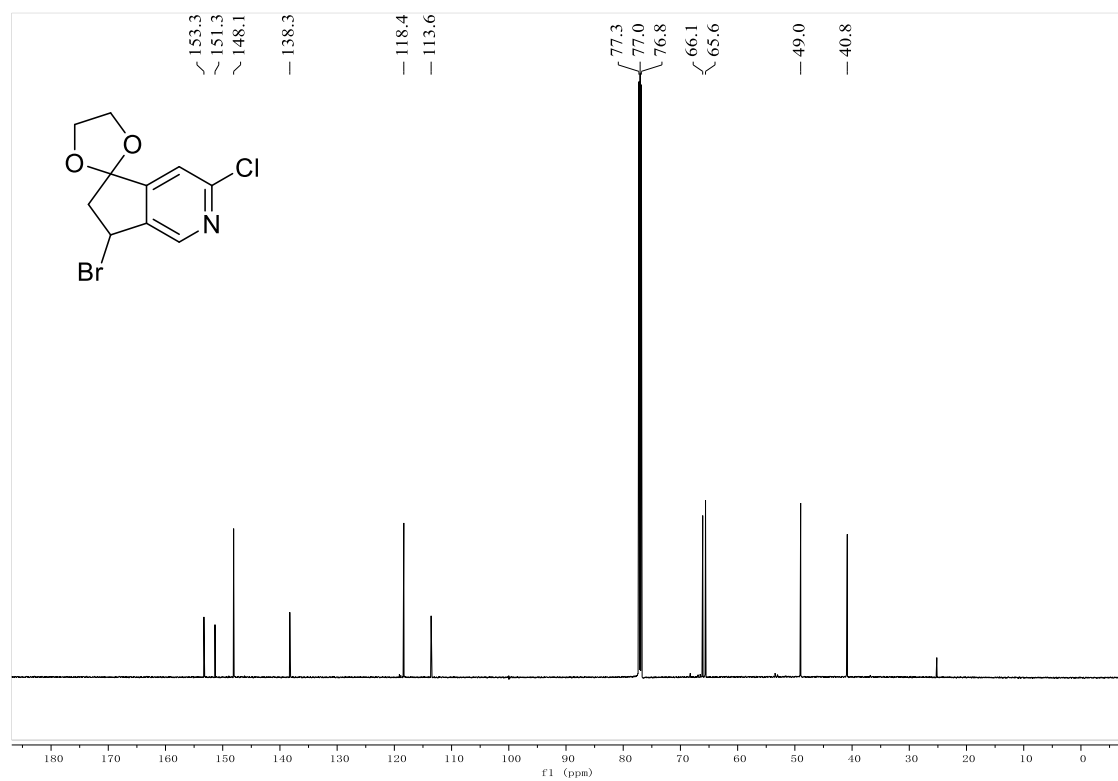

Figure S40  $^{13}\text{C}$  NMR Spectra of compound **26** (150 MHz,  $\text{CDCl}_3$ )

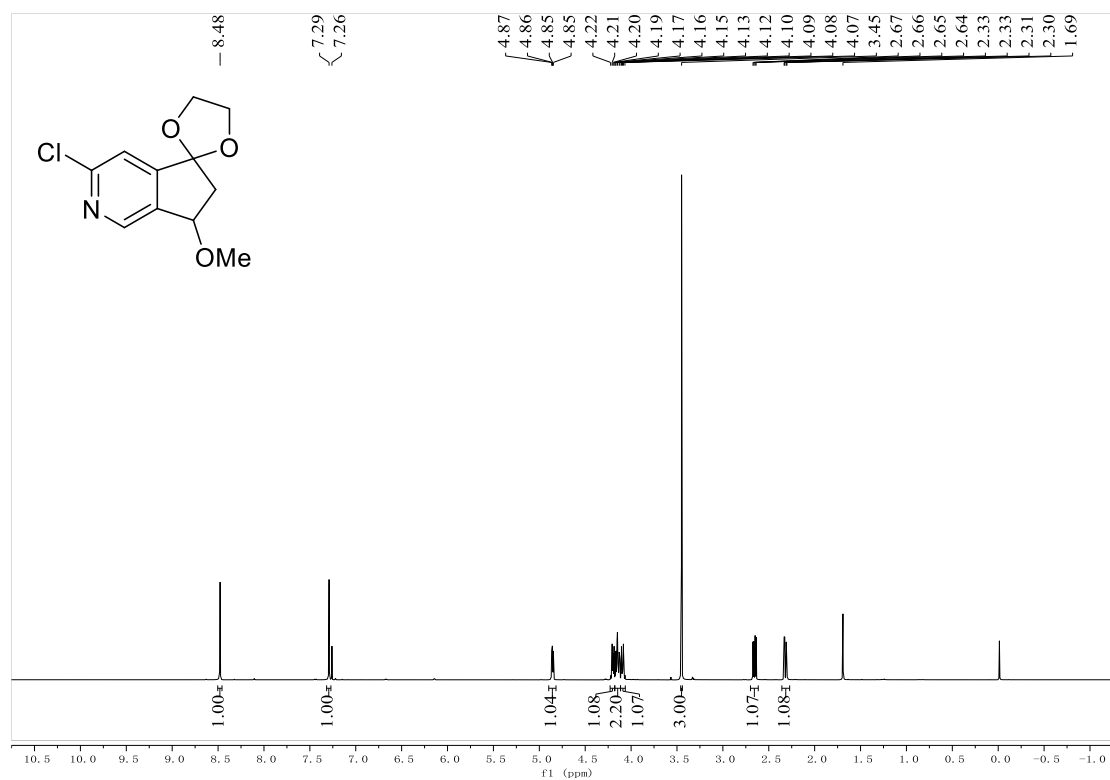

Figure S41 <sup>1</sup>H NMR Spectra of compound **27** (600 MHz, CDCl<sub>3</sub>)

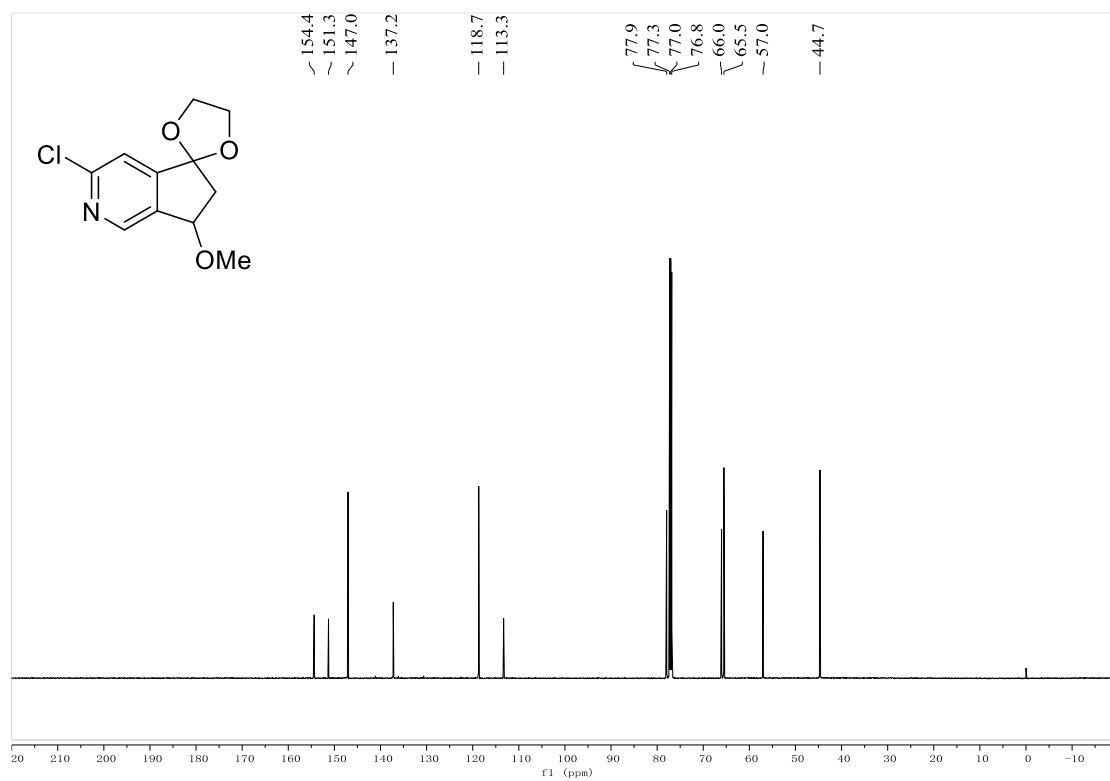

Figure S42 <sup>13</sup>C NMR Spectra of compound **27** (150 MHz, CDCl<sub>3</sub>)

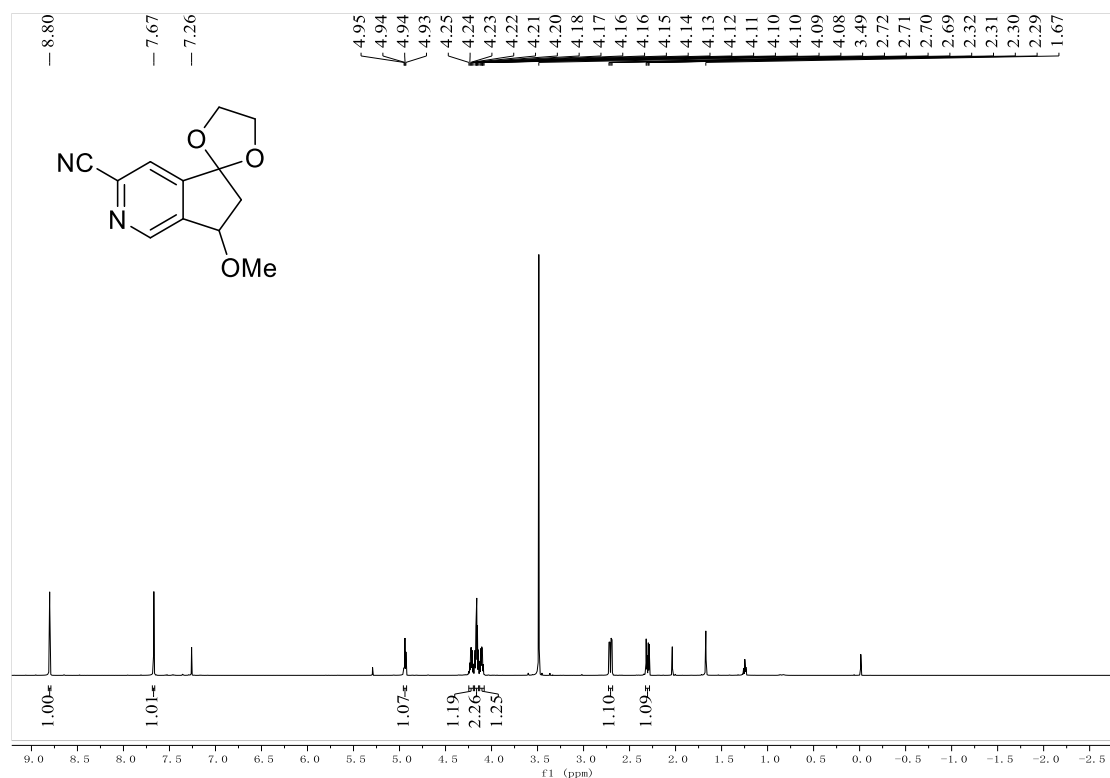

Figure S43  $^1\text{H}$  NMR Spectra of compound **28** (600 MHz,  $\text{CDCl}_3$ )

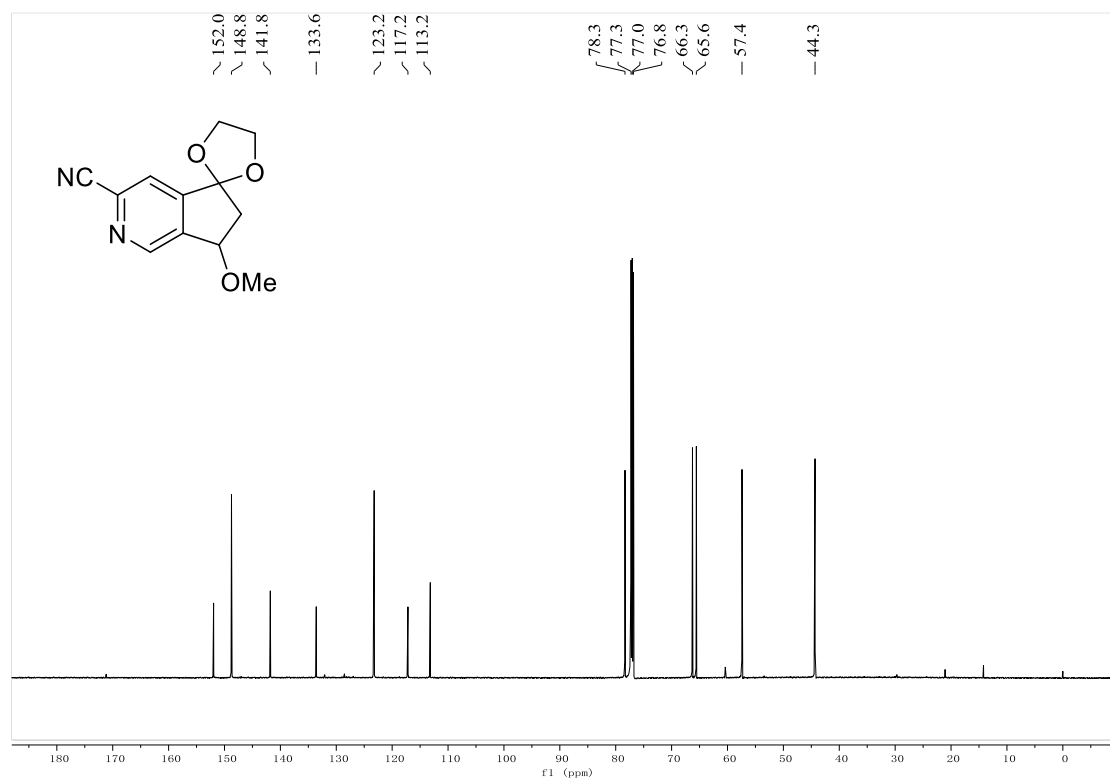

Figure S44  $^{13}\text{C}$  NMR Spectra of compound **28** (150 MHz,  $\text{CDCl}_3$ )

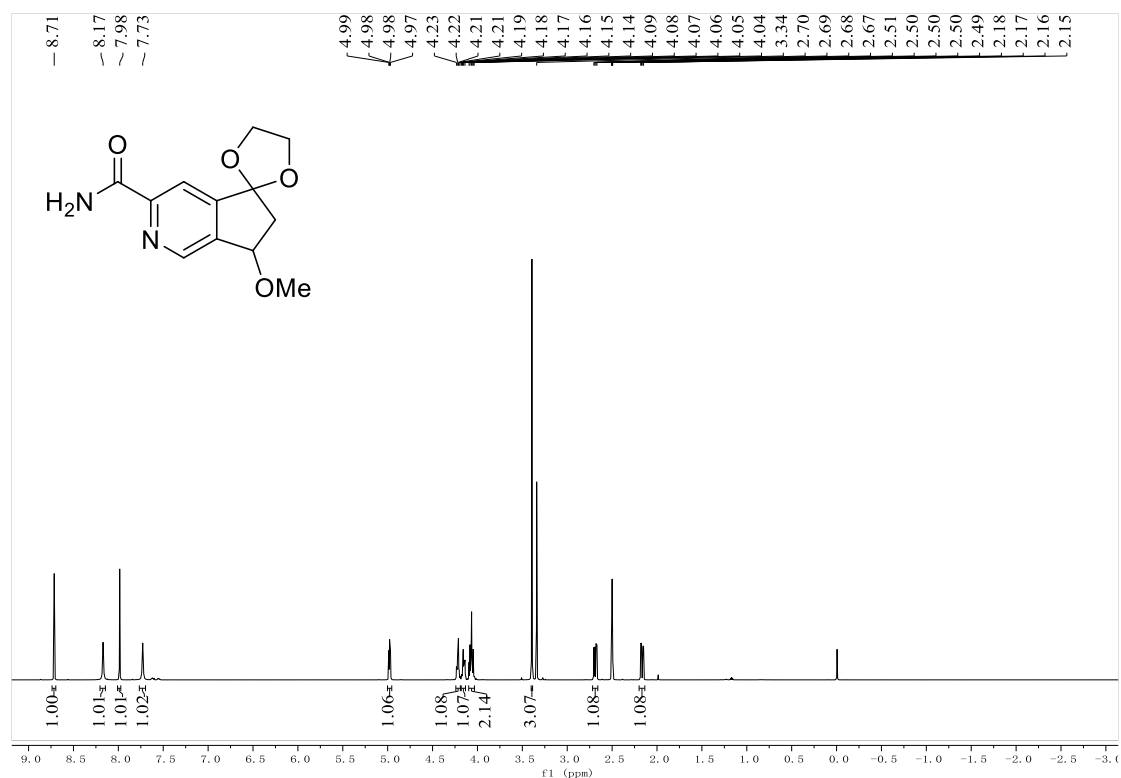

Figure S45 <sup>1</sup>H NMR Spectra of compound **29** (600 MHz, DMSO-*d*<sub>6</sub>)

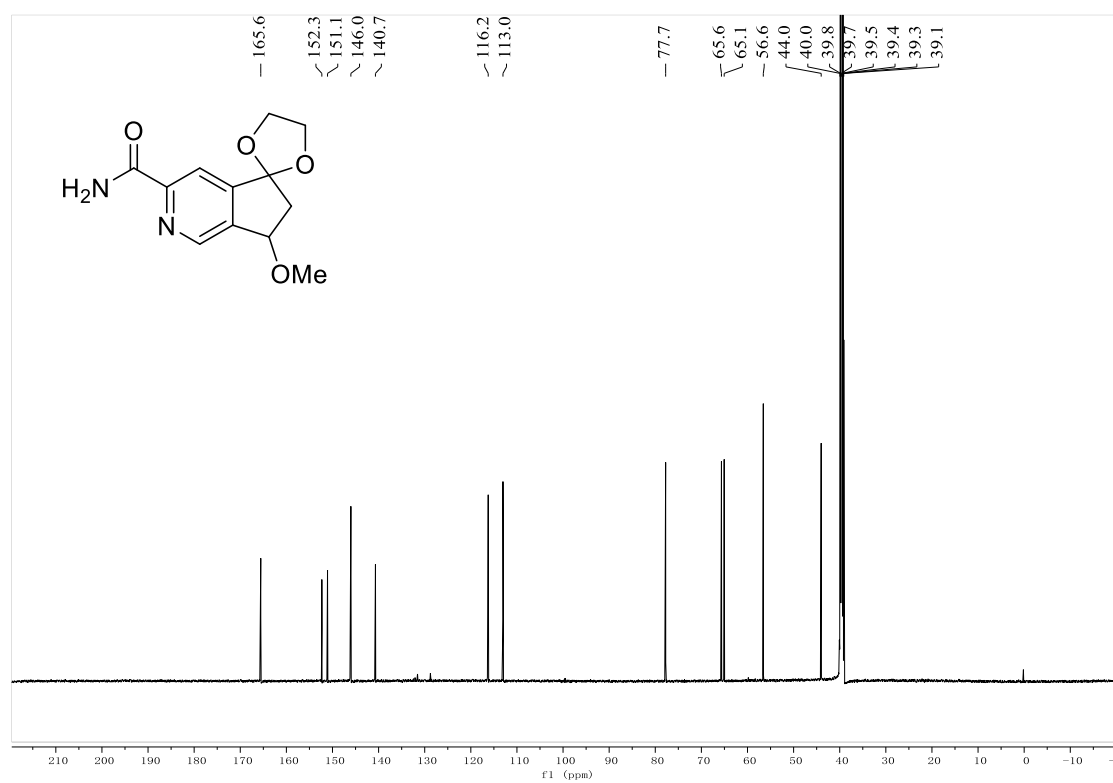

Figure S46 <sup>13</sup>C NMR Spectra of compound **29** (150 MHz, DMSO-*d*<sub>6</sub>)



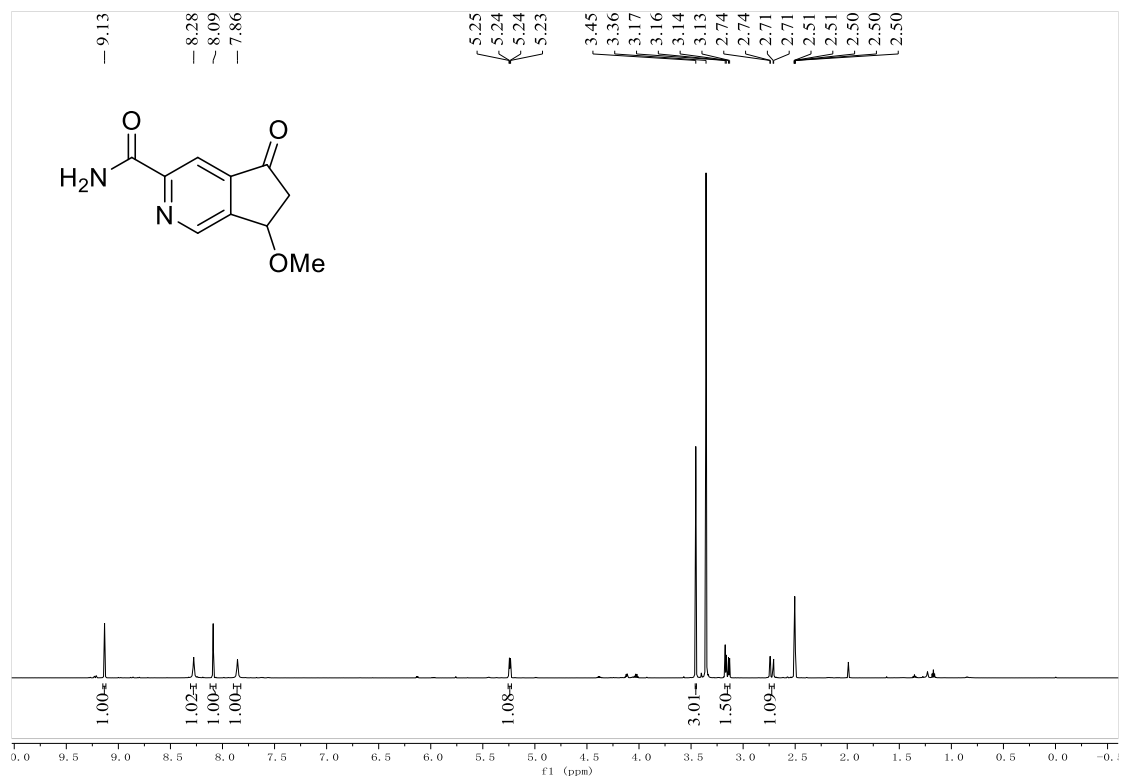

Figure S47  $^1\text{H}$  NMR Spectra of amycolasporin B (**2**) (600 MHz,  $\text{DMSO-}d_6$ )

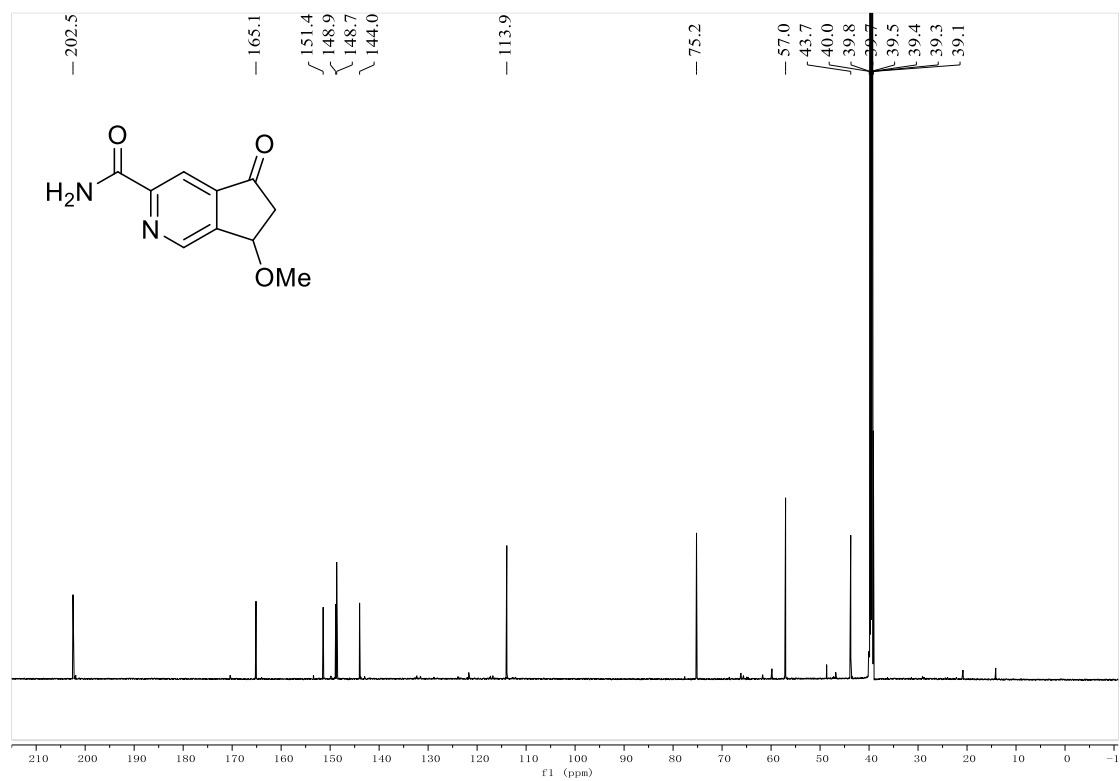

Figure S48  $^{13}\text{C}$  NMR Spectra of amycolasporin B (**2**) (150 MHz,  $\text{DMSO-}d_6$ )

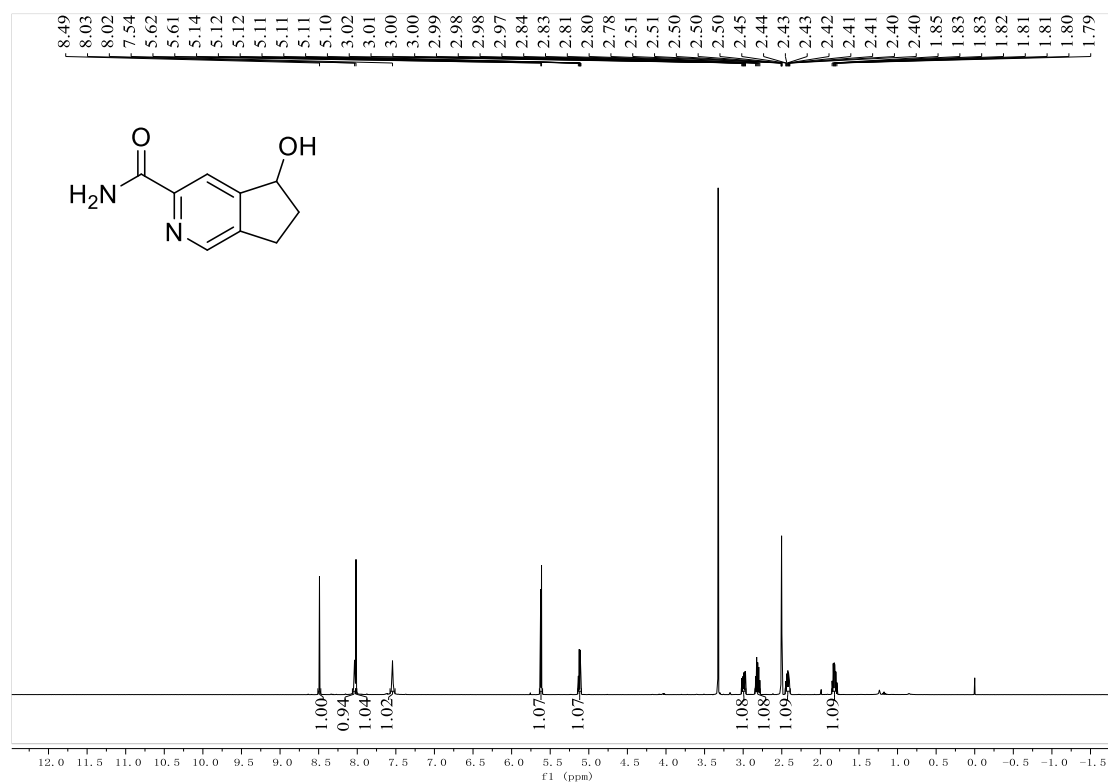

Figure S49 <sup>1</sup>H NMR Spectra of compound **30a** (600 MHz, DMSO-*d*<sub>6</sub>)

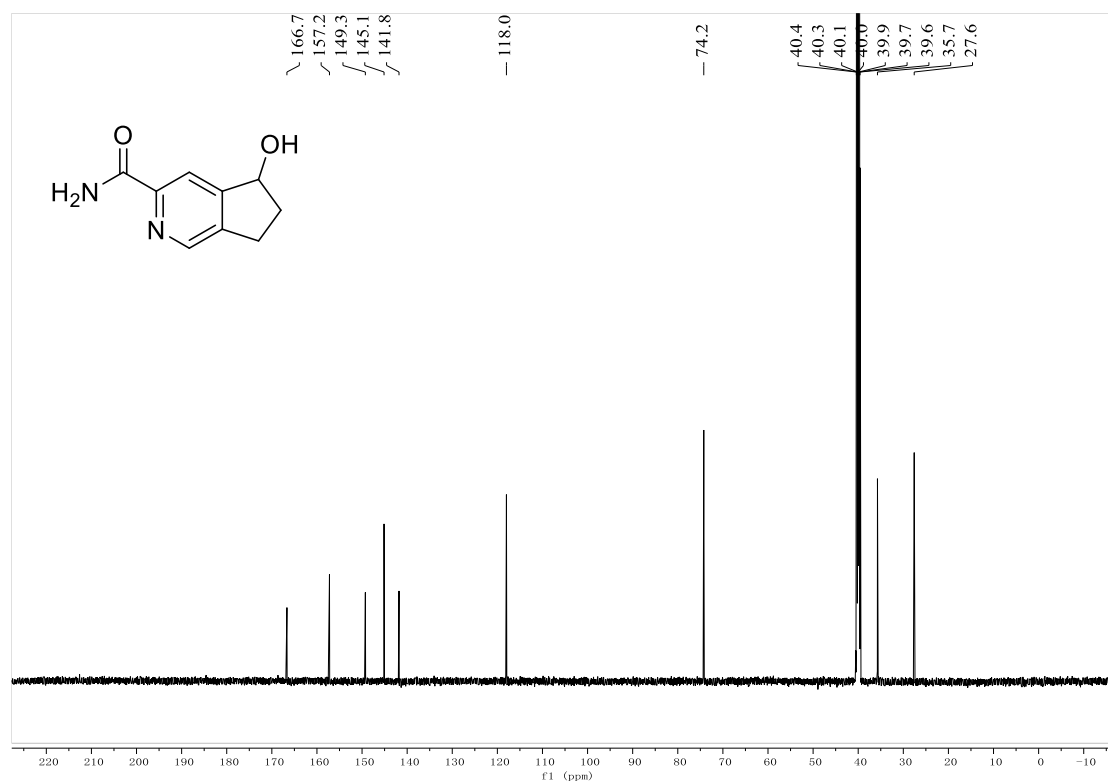

Figure S50 <sup>13</sup>C NMR Spectra of compound **30a** (150 MHz, DMSO-*d*<sub>6</sub>)

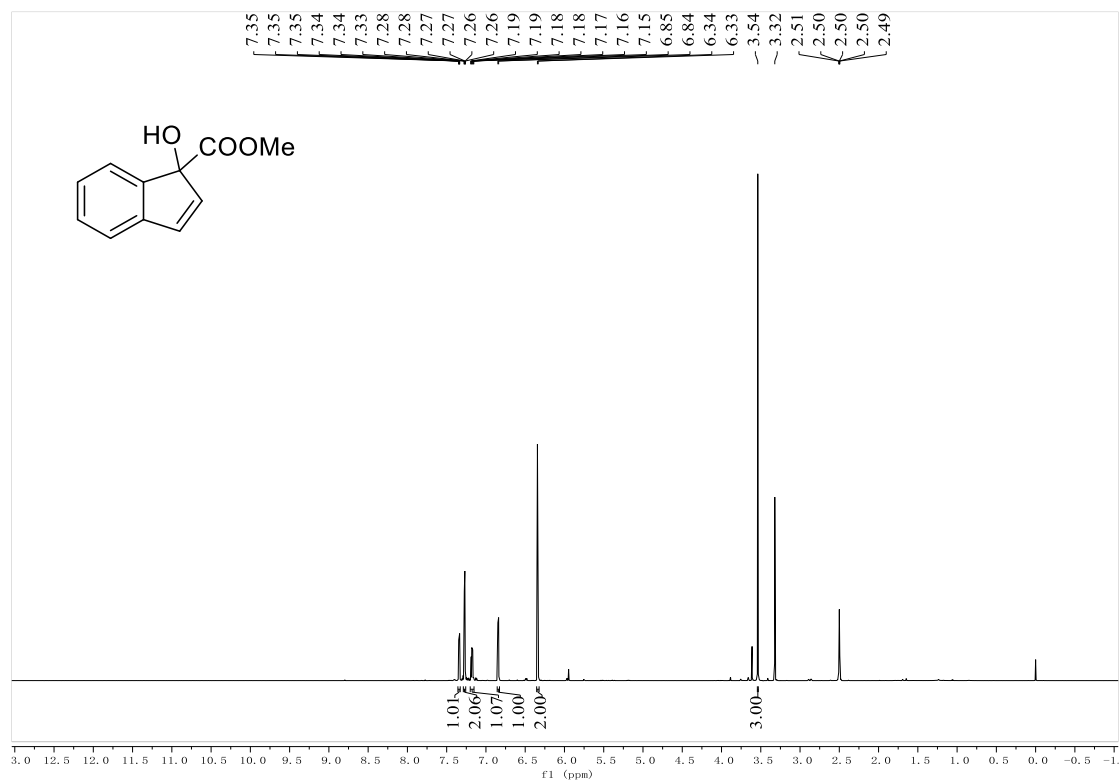

Figure S51 <sup>1</sup>H NMR Spectra of compound **30b** (600 MHz, DMSO-*d*<sub>6</sub>)

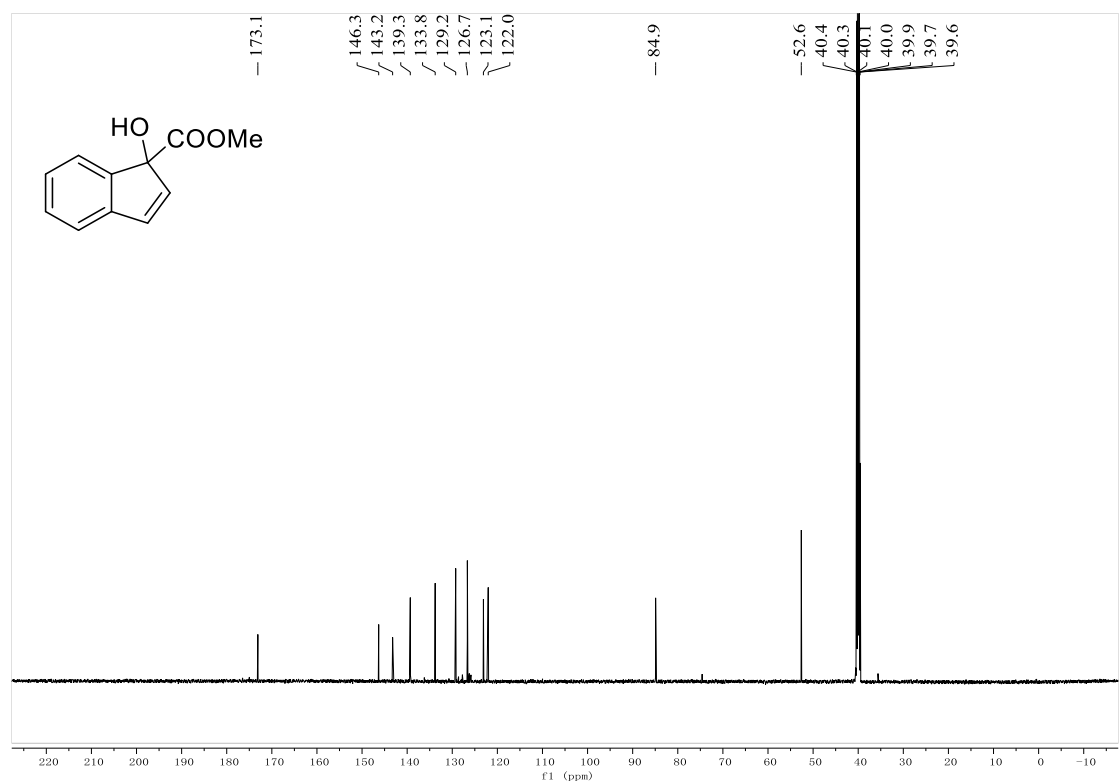

Figure S52 <sup>13</sup>C NMR Spectra of compound **30b** (150 MHz, DMSO-*d*<sub>6</sub>)

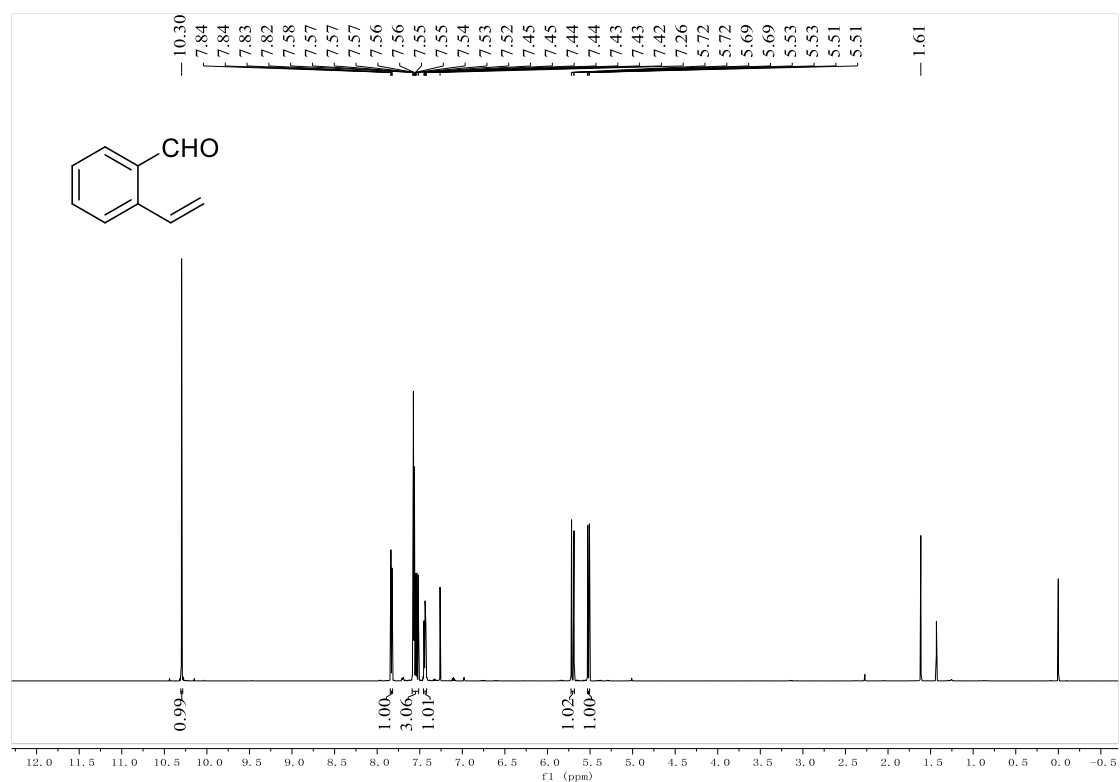

Figure S53  $^1\text{H}$  NMR Spectra of 2-ethenyl- $\alpha$ -hydroxy-benzeneacetonitrile (600 MHz,  $\text{CDCl}_3$ )

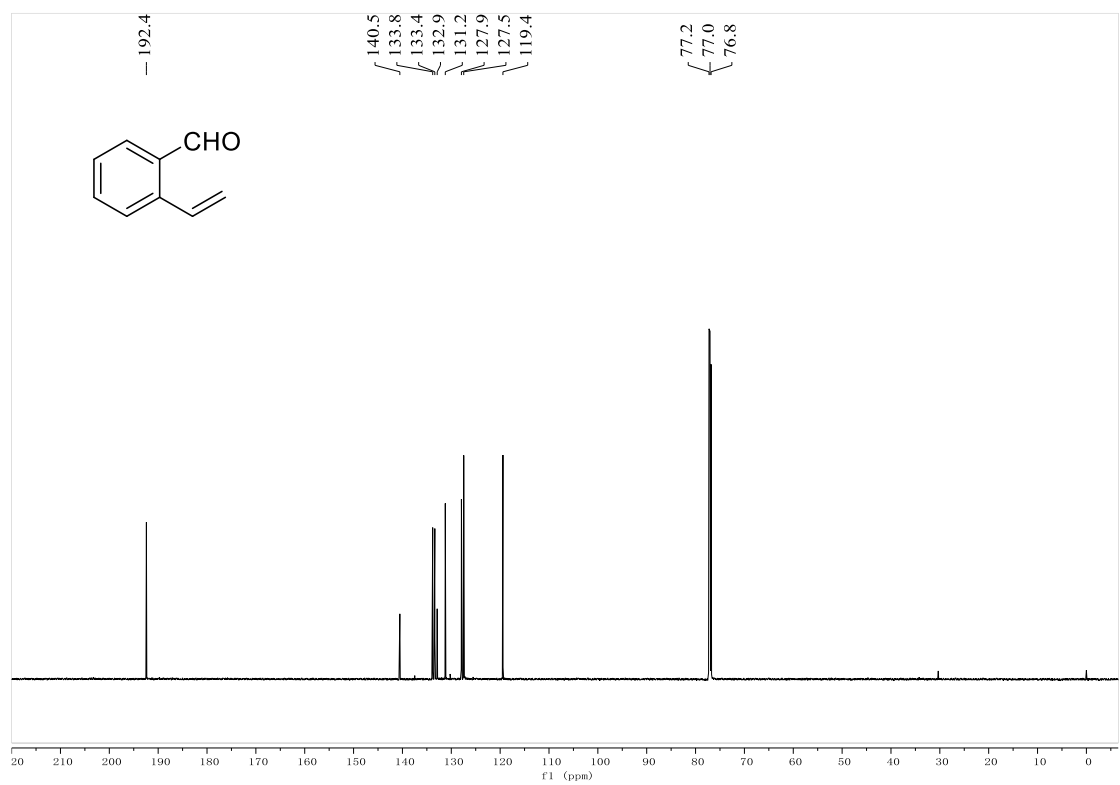

Figure S54  $^{13}\text{C}$  NMR Spectra of 2-ethenyl- $\alpha$ -hydroxy-benzeneacetonitrile (150 MHz,  $\text{CDCl}_3$ )

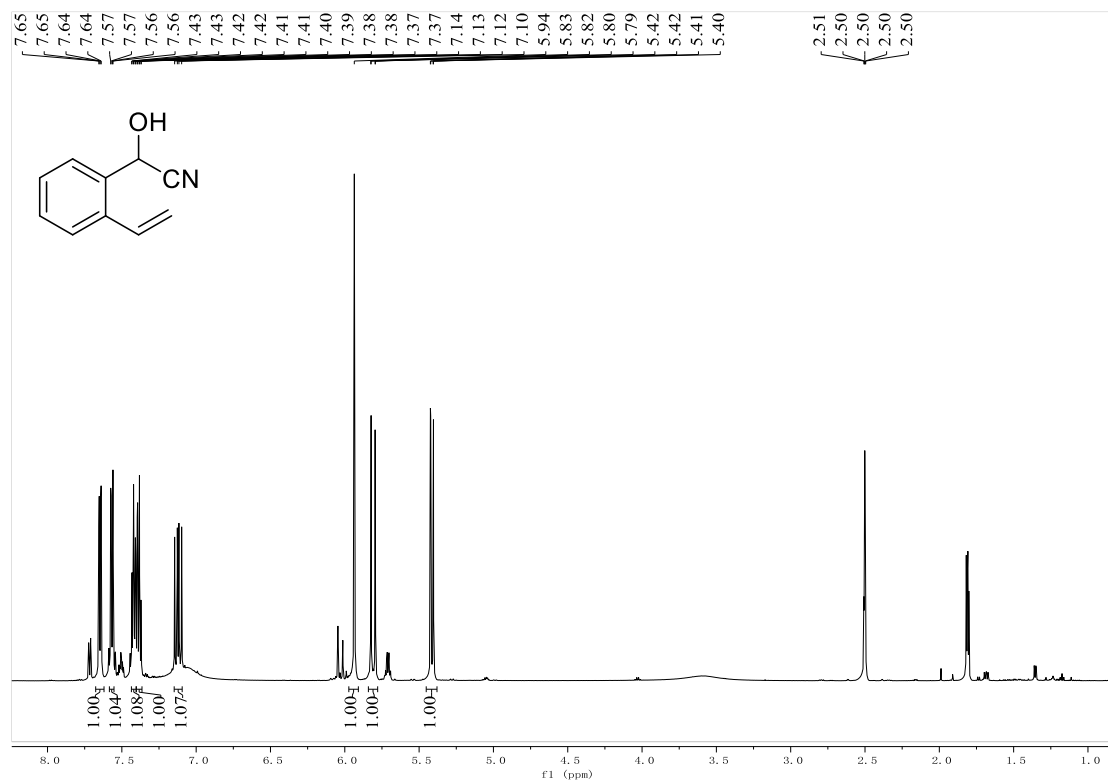

Figure S55  $^1\text{H}$  NMR Spectra of methyl 2-ethenyl- $\alpha$ -hydroxy-benzeneacetate (600 MHz,  $\text{CDCl}_3$ )

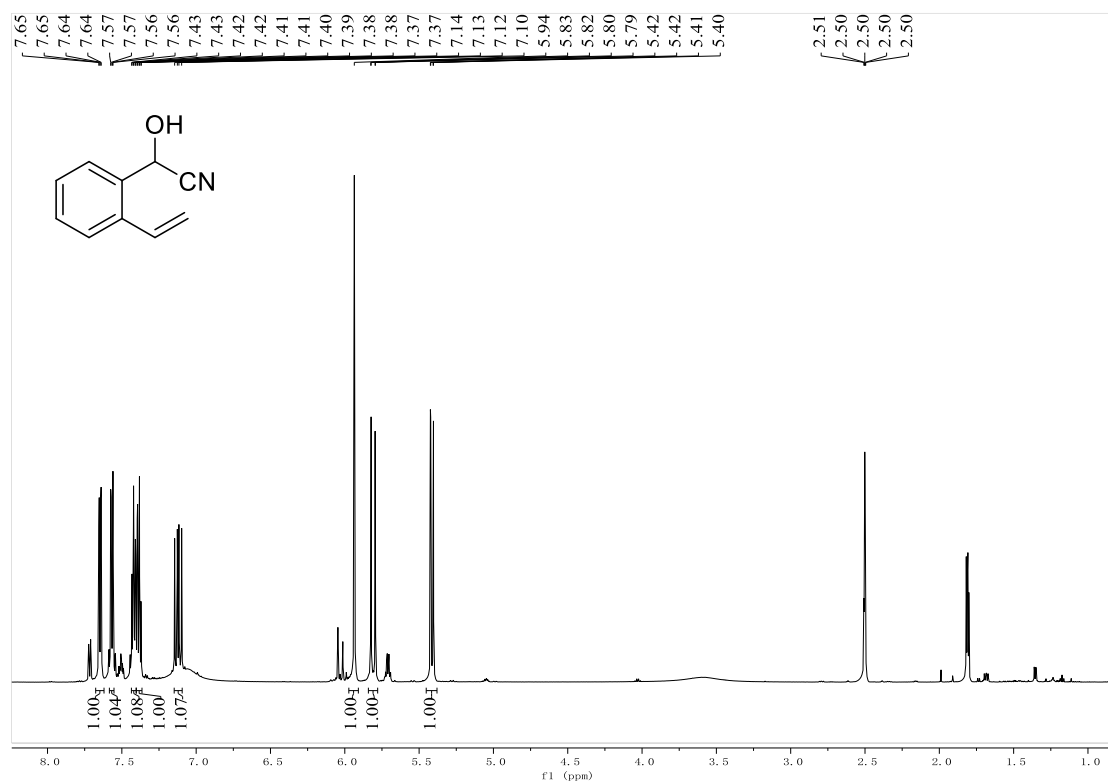

Figure S56  $^{13}\text{C}$  NMR Spectra of methyl 2-ethenyl- $\alpha$ -hydroxy-benzeneacetate (150 MHz,  $\text{DMSO}-d_6$ )

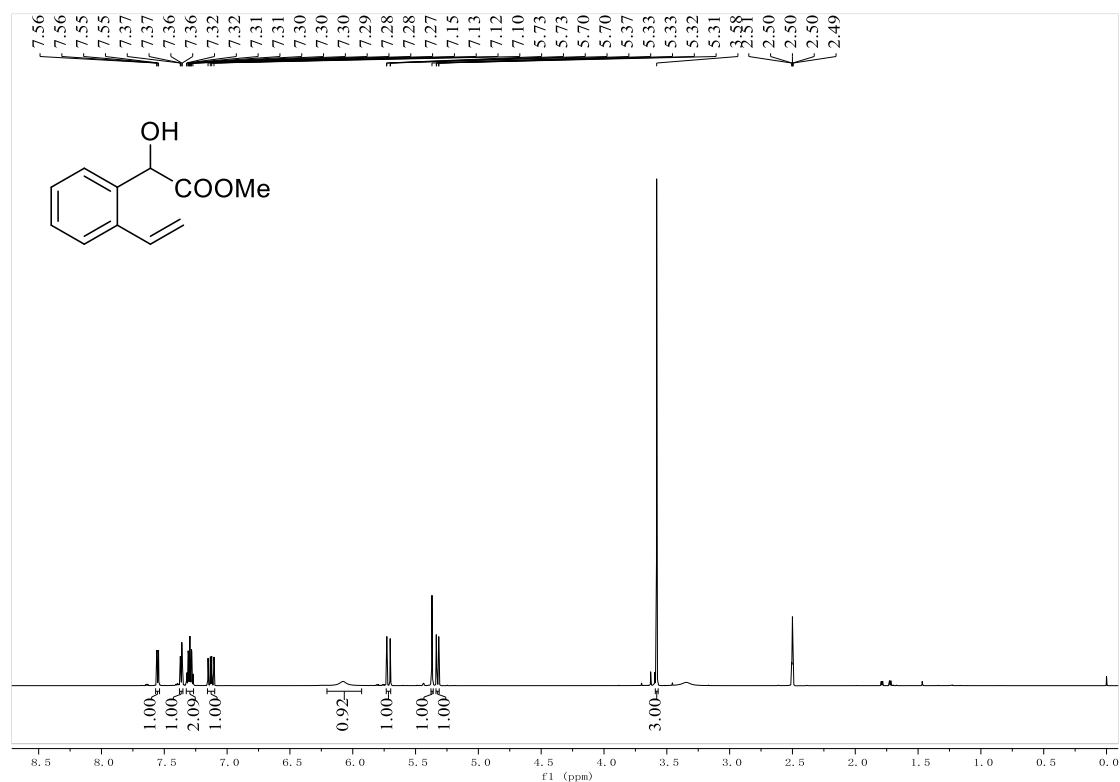

Figure S57  $^1\text{H}$  NMR Spectra of 2-ethenyl- $\alpha$ -oxo-benzeneacetate  
(600 MHz,  $\text{DMSO-}d_6$ )

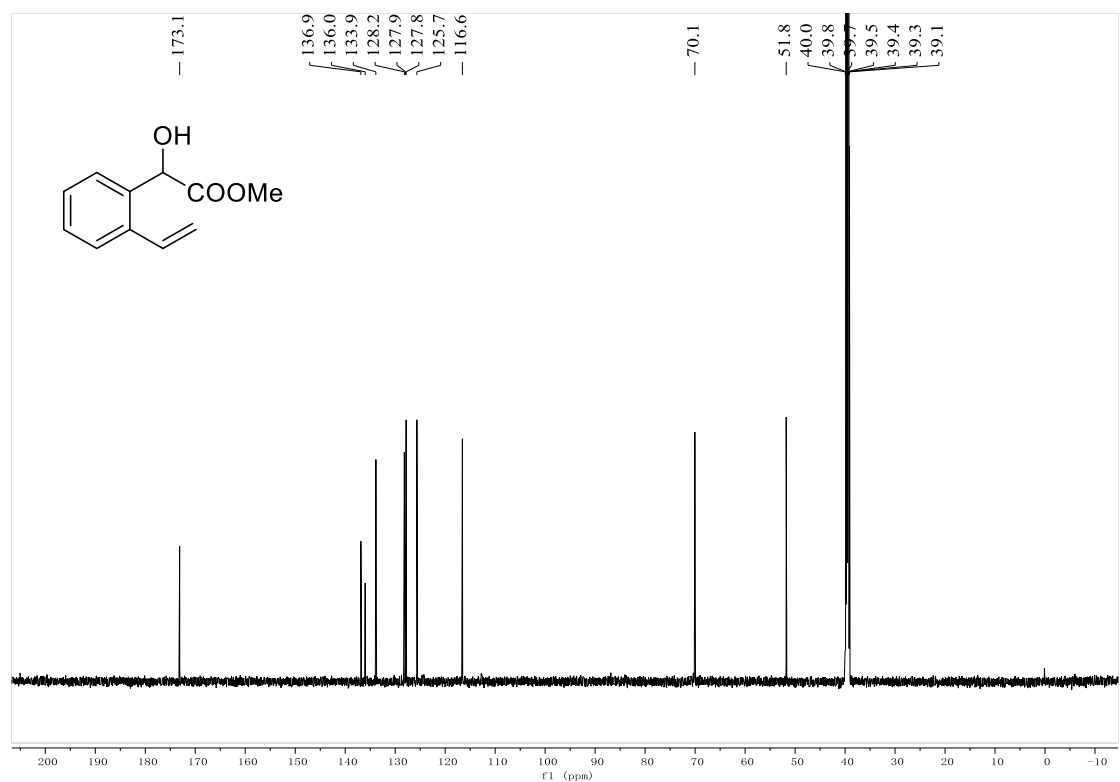

Figure S58  $^{13}\text{C}$  NMR Spectra of 2-ethenyl- $\alpha$ -oxo-benzeneacetate  
(150 MHz,  $\text{DMSO-}d_6$ )

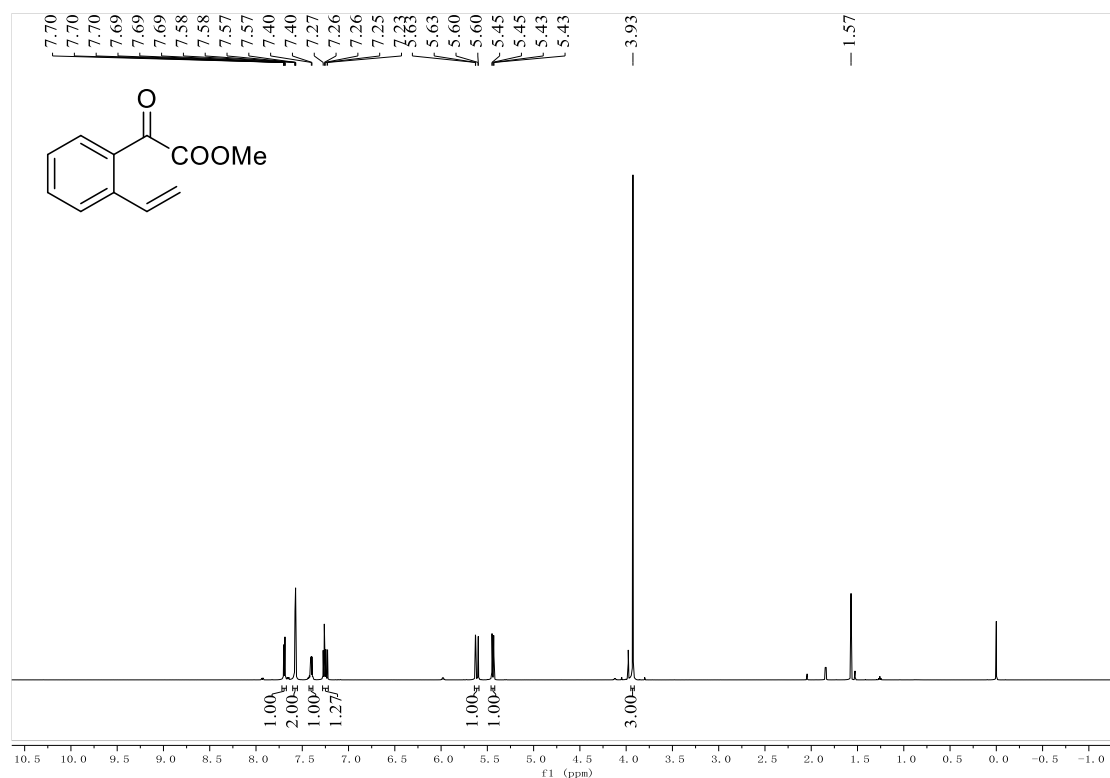

Figure S59 <sup>1</sup>H NMR Spectra of 2-ethenyl- $\alpha$ -oxo-benzeneacetate (600 MHz, CDCl<sub>3</sub>)

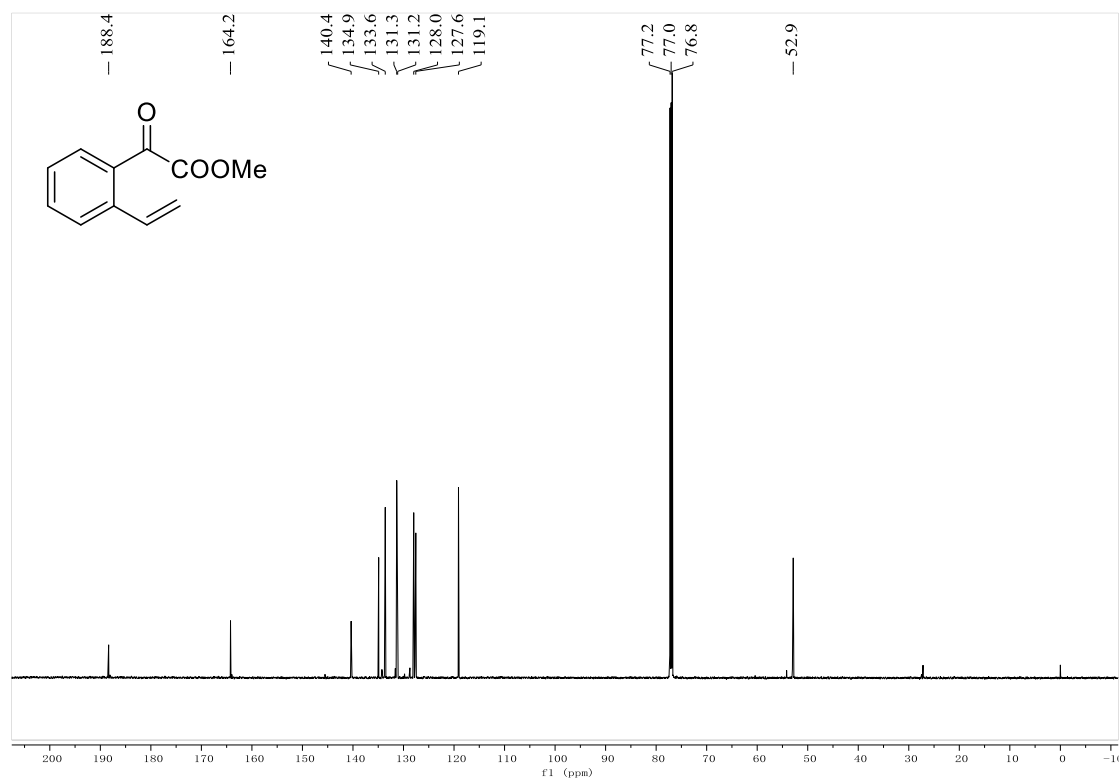

Figure S60 <sup>13</sup>C NMR Spectra of 2-ethenyl- $\alpha$ -oxo-benzeneacetate (150 MHz, CDCl<sub>3</sub>)

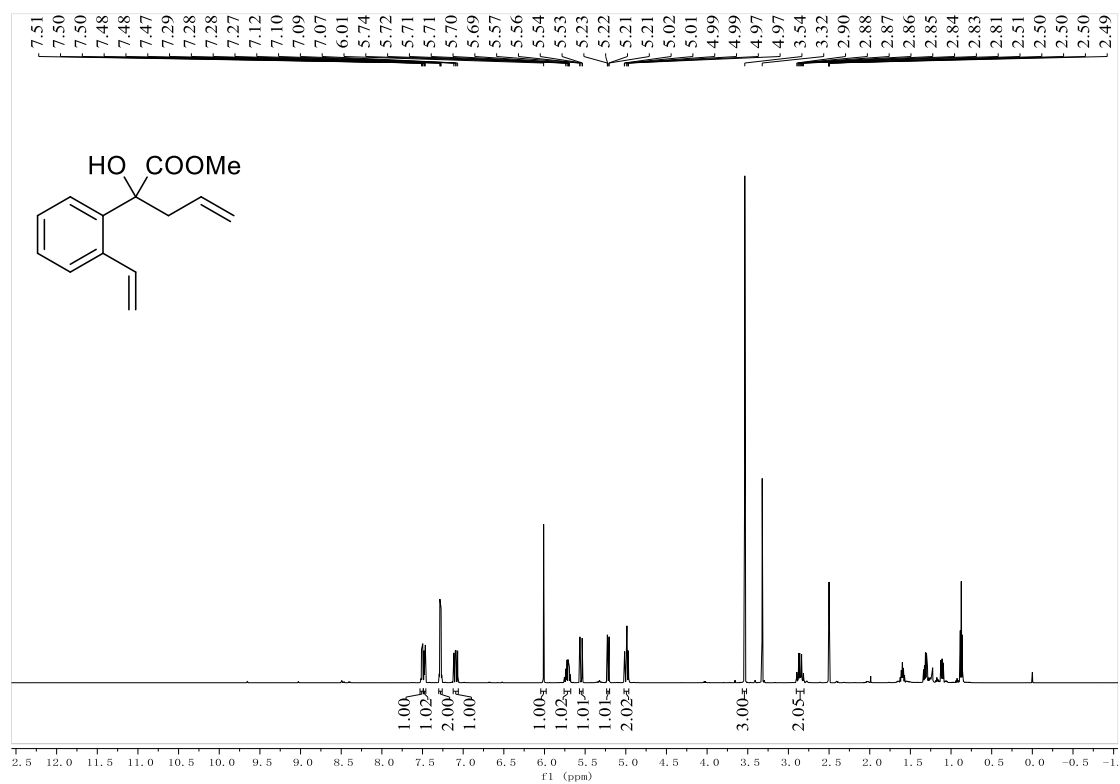

Figure S61 <sup>1</sup>H NMR Spectra of compound **33a** (600 MHz, DMSO-*d*<sub>6</sub>)

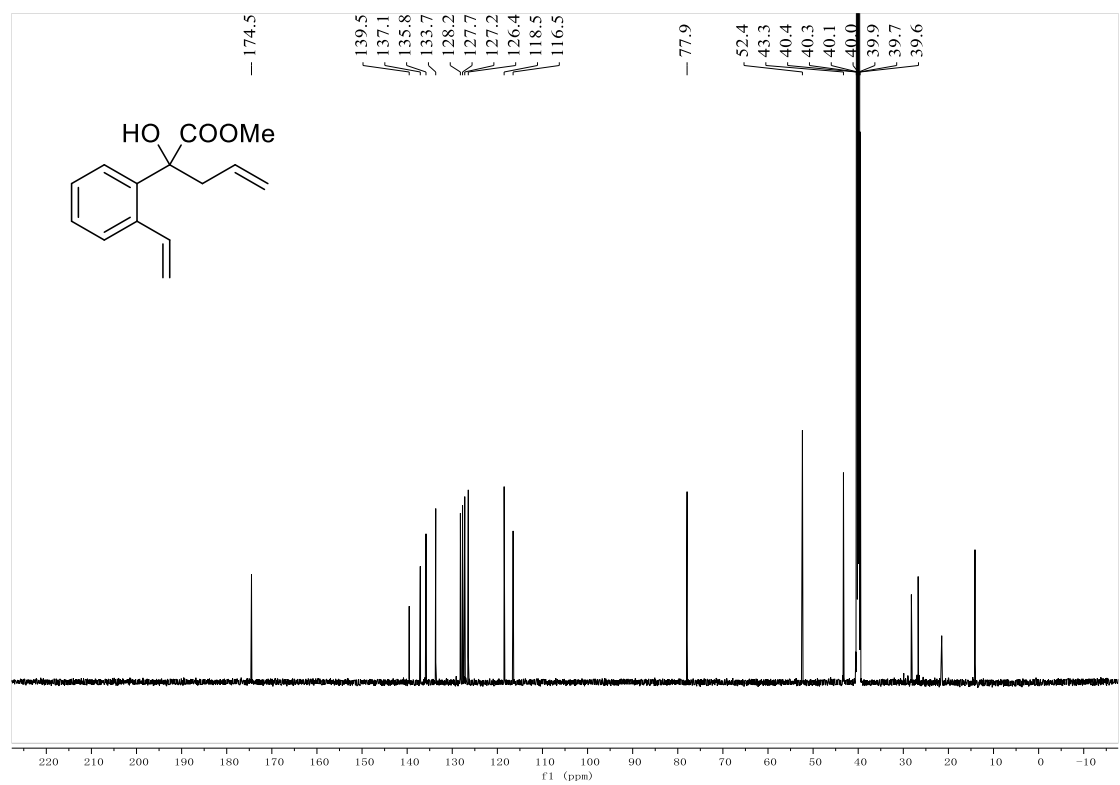

Figure S62 <sup>13</sup>C NMR Spectra of compound **33a** (150 MHz, DMSO-*d*<sub>6</sub>)



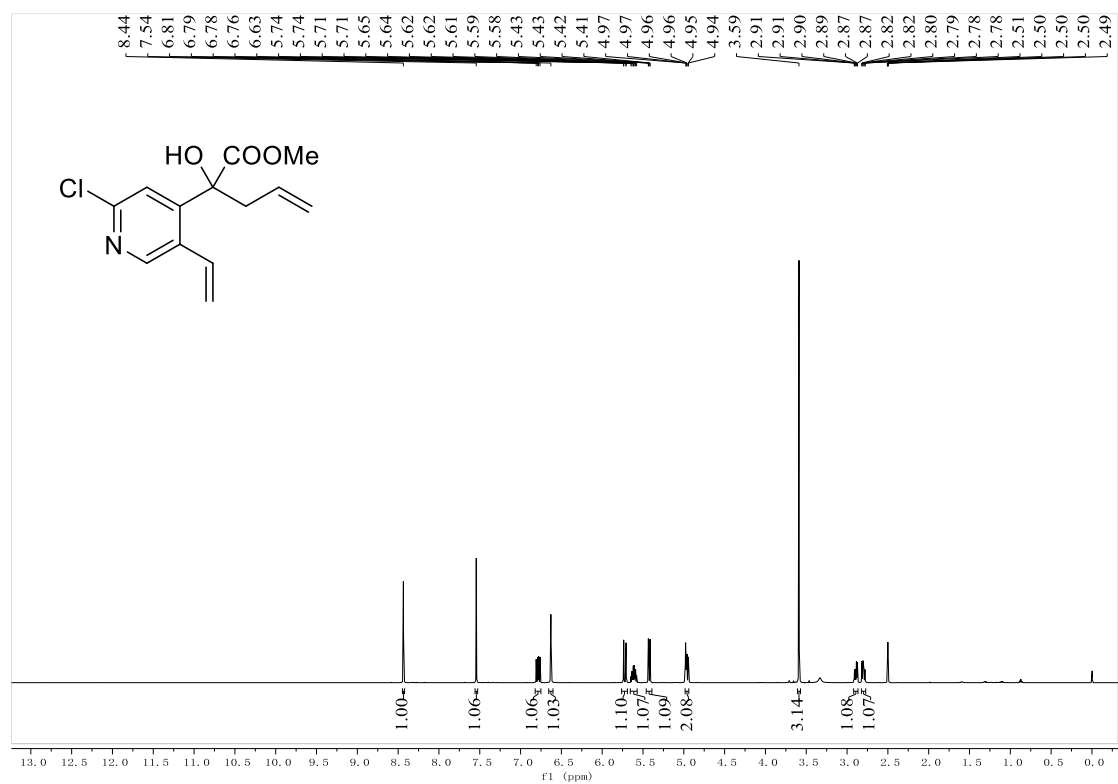

Figure S63  $^1\text{H}$  NMR Spectra of compound **33b** (600 MHz,  $\text{DMSO-}d_6$ )

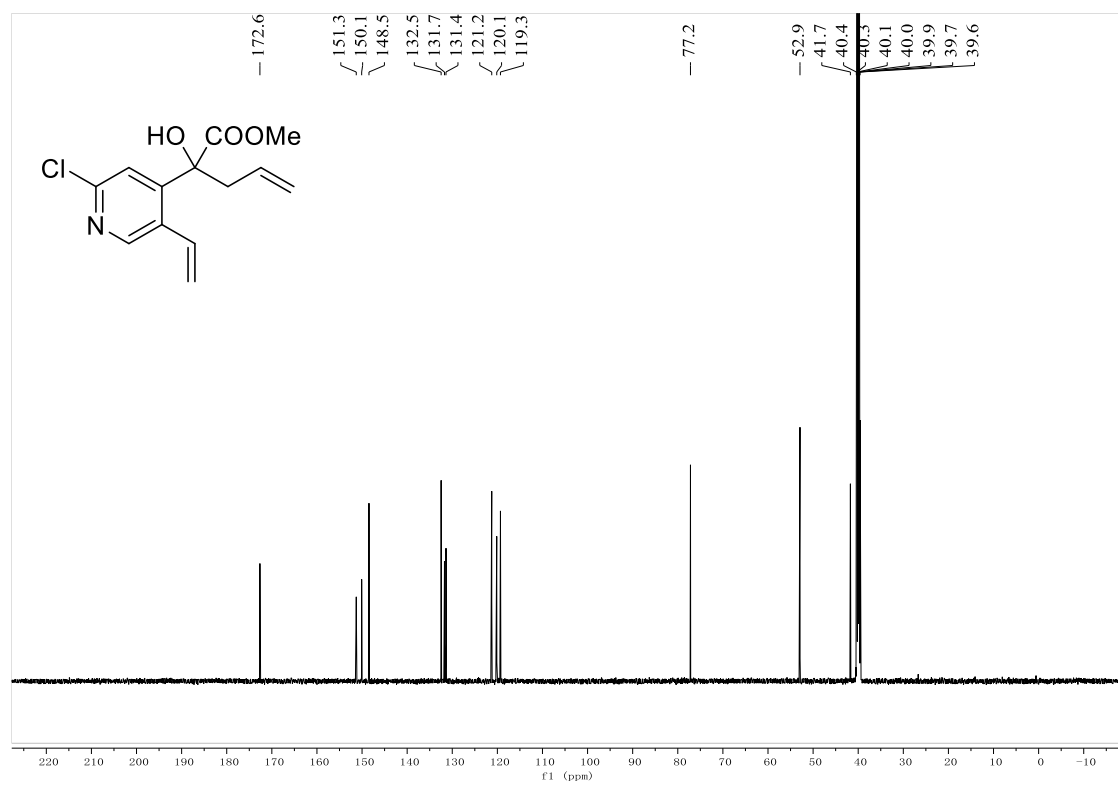

Figure S64  $^{13}\text{C}$  NMR Spectra of compound **33b** (150 MHz,  $\text{DMSO-}d_6$ )

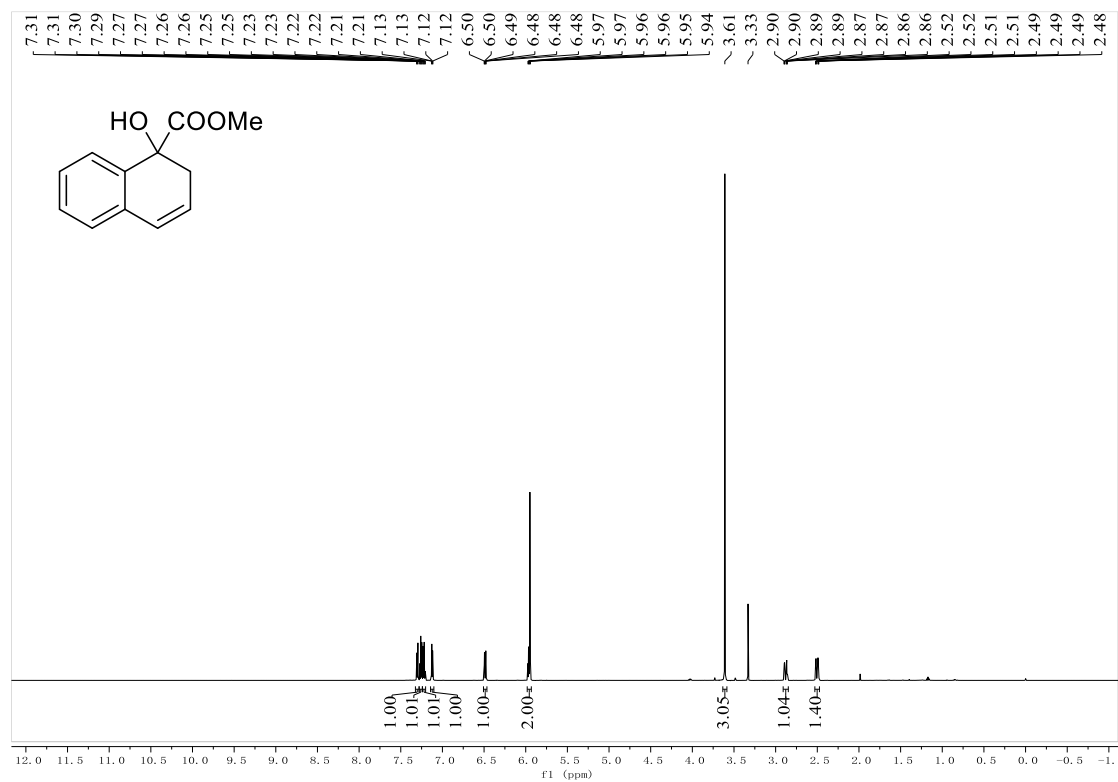

Figure S65 <sup>1</sup>H NMR Spectra of compound **30c** (600 MHz, DMSO-*d*<sub>6</sub>)

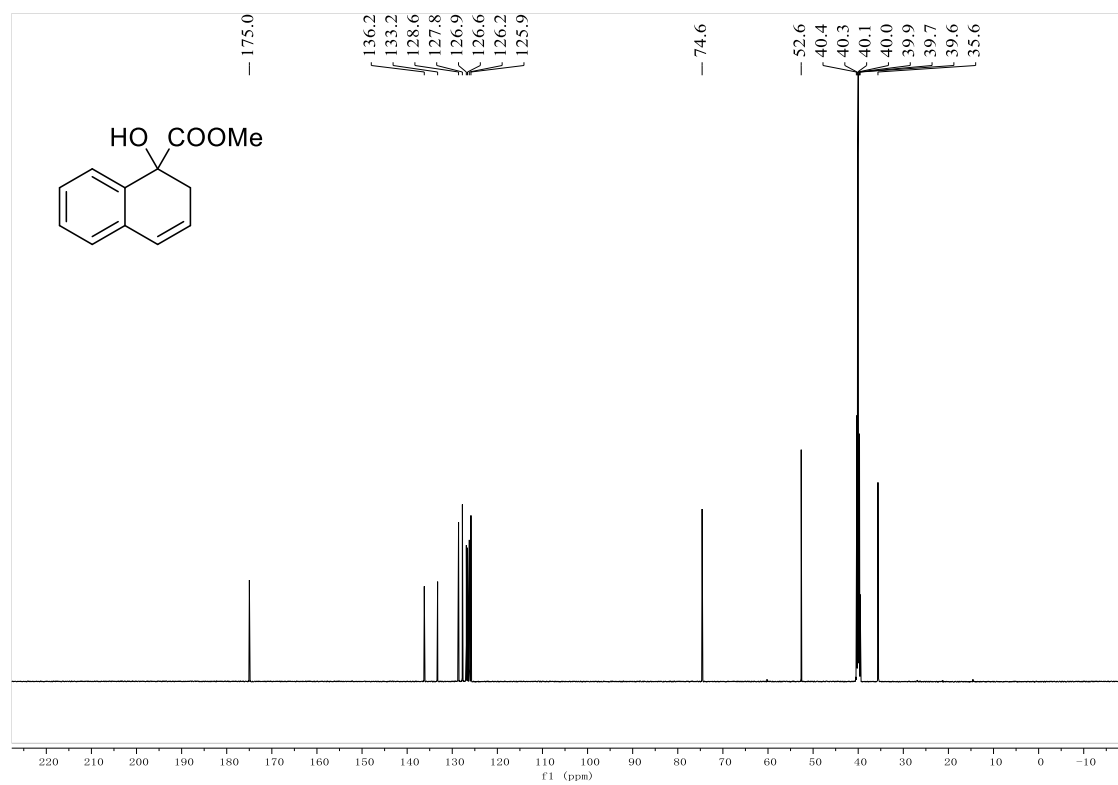

Figure S66 <sup>13</sup>C NMR Spectra of compound **30c** (150 MHz, DMSO-*d*<sub>6</sub>)

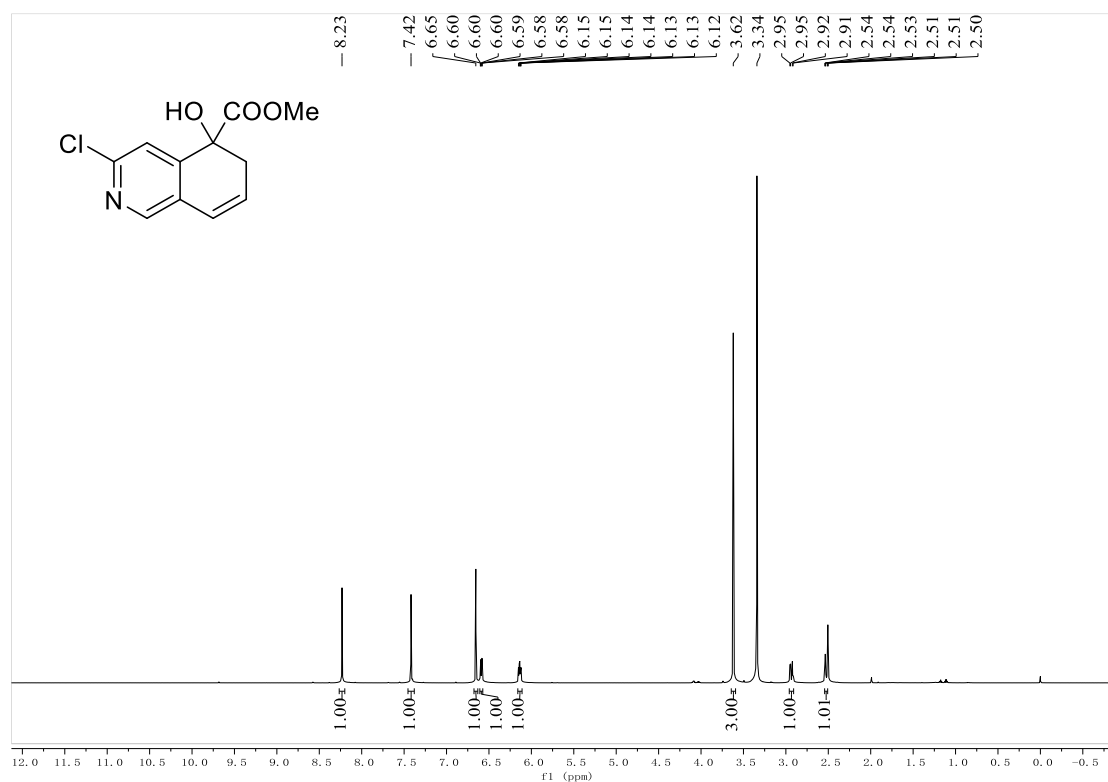

Figure S67 <sup>1</sup>H NMR Spectra of compound **30d** (600 MHz, DMSO-*d*<sub>6</sub>)

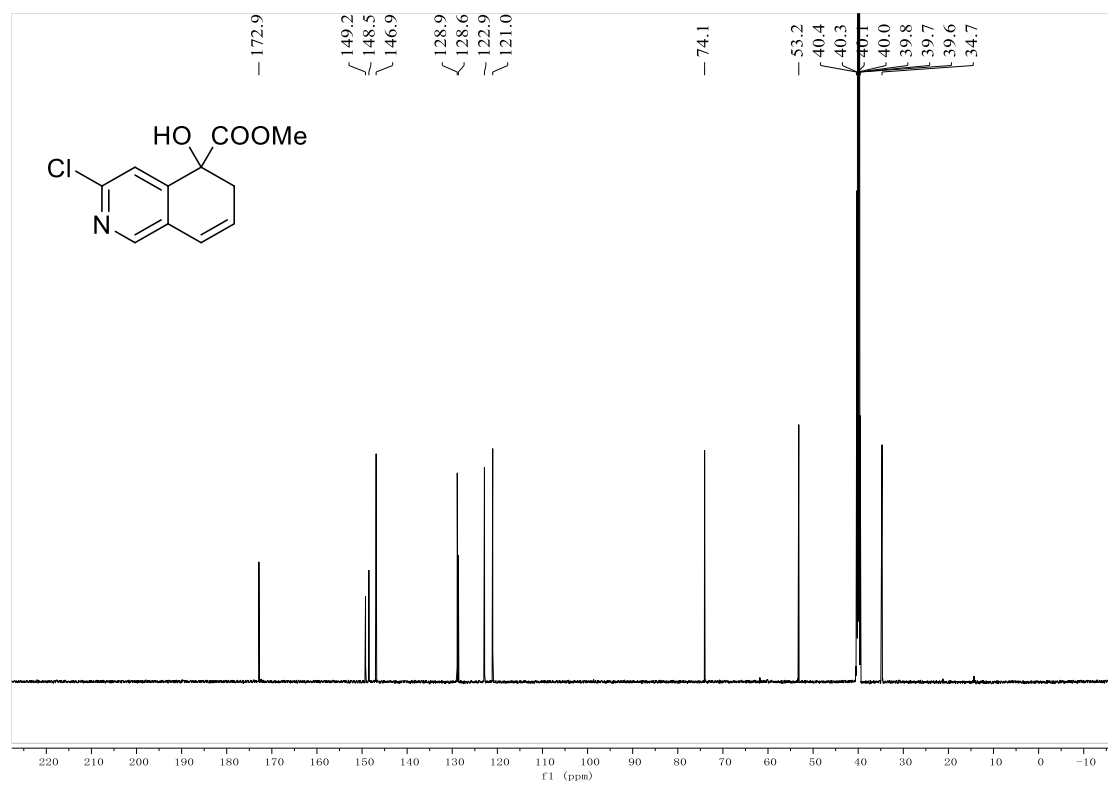

Figure S68 <sup>13</sup>C NMR Spectra of compound **30d** (150 MHz, DMSO-*d*<sub>6</sub>)

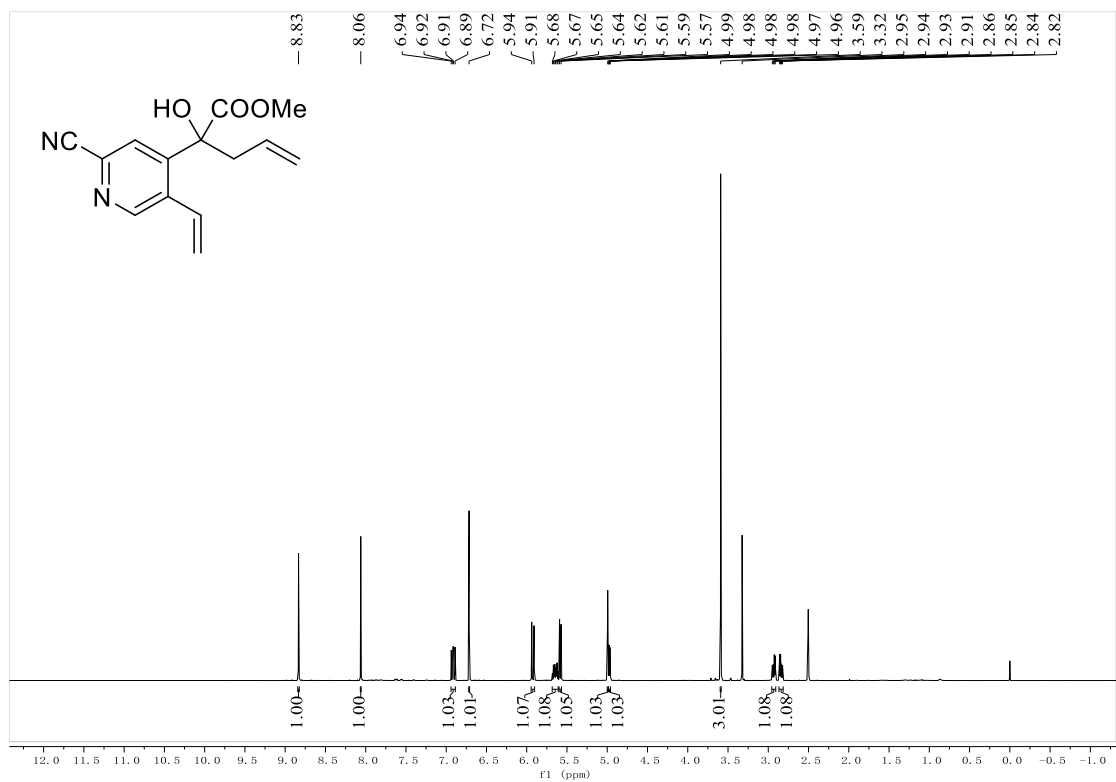

Figure S69 <sup>1</sup>H NMR Spectra of compound **34** (600 MHz, DMSO-*d*<sub>6</sub>)

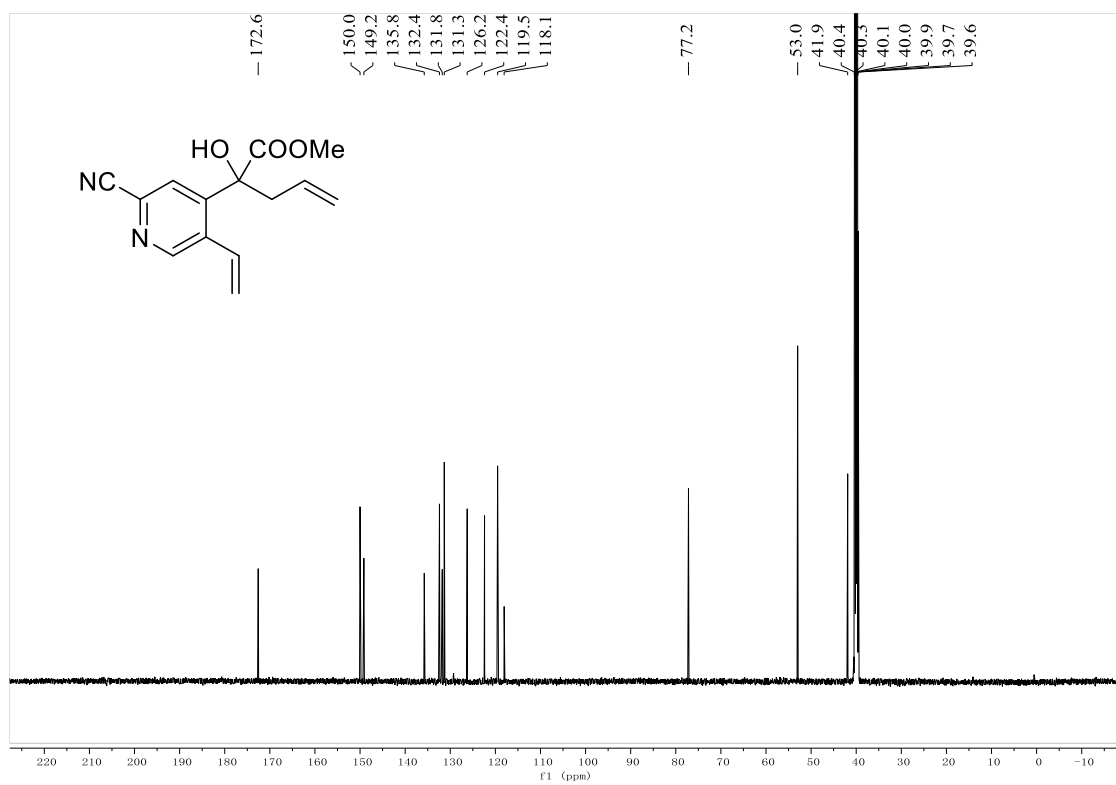

Figure S70 <sup>13</sup>C NMR Spectra of compound **34** (150 MHz, DMSO-*d*<sub>6</sub>)

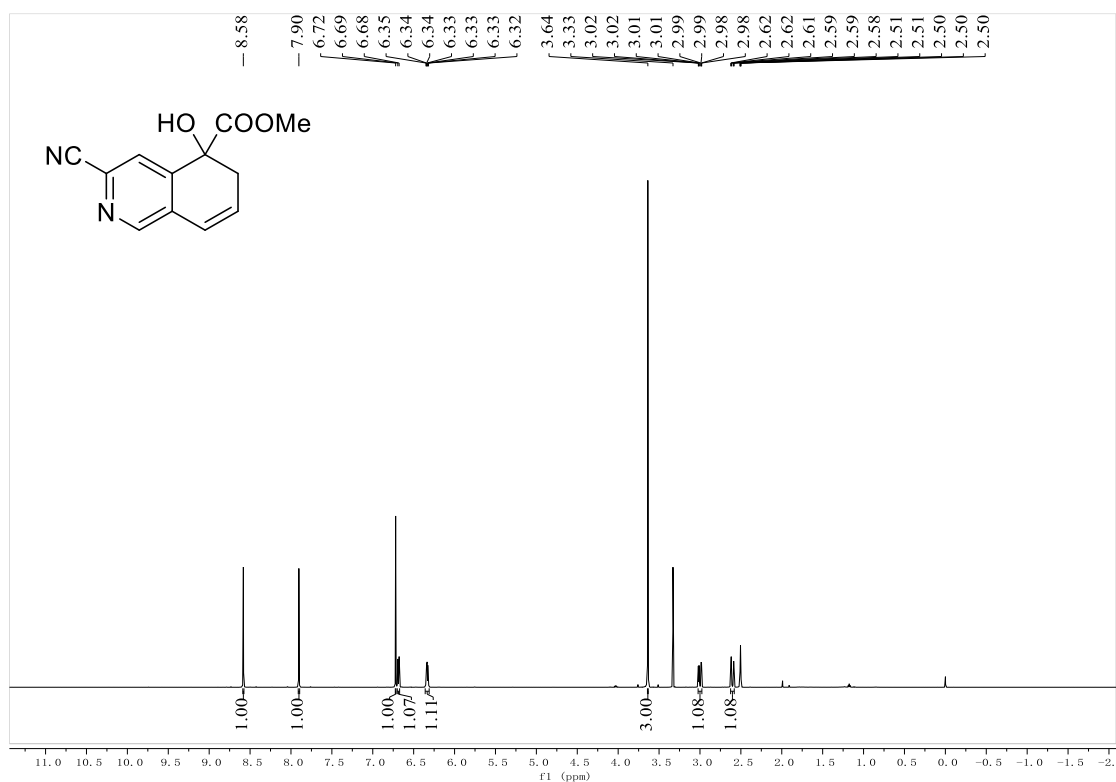

Figure S71  $^1\text{H}$  NMR Spectra of compound **30e** (600 MHz,  $\text{DMSO-}d_6$ )

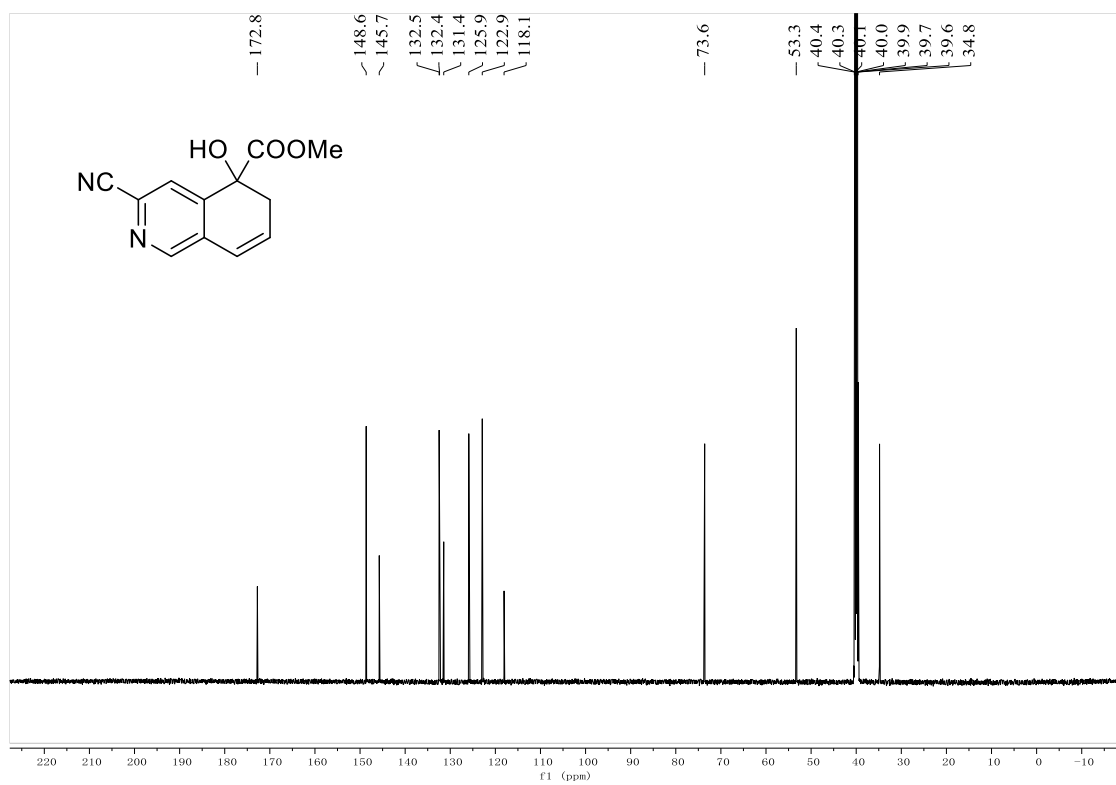

Figure S72  $^{13}\text{C}$  NMR Spectra of compound **30e** (150 MHz,  $\text{DMSO-}d_6$ )

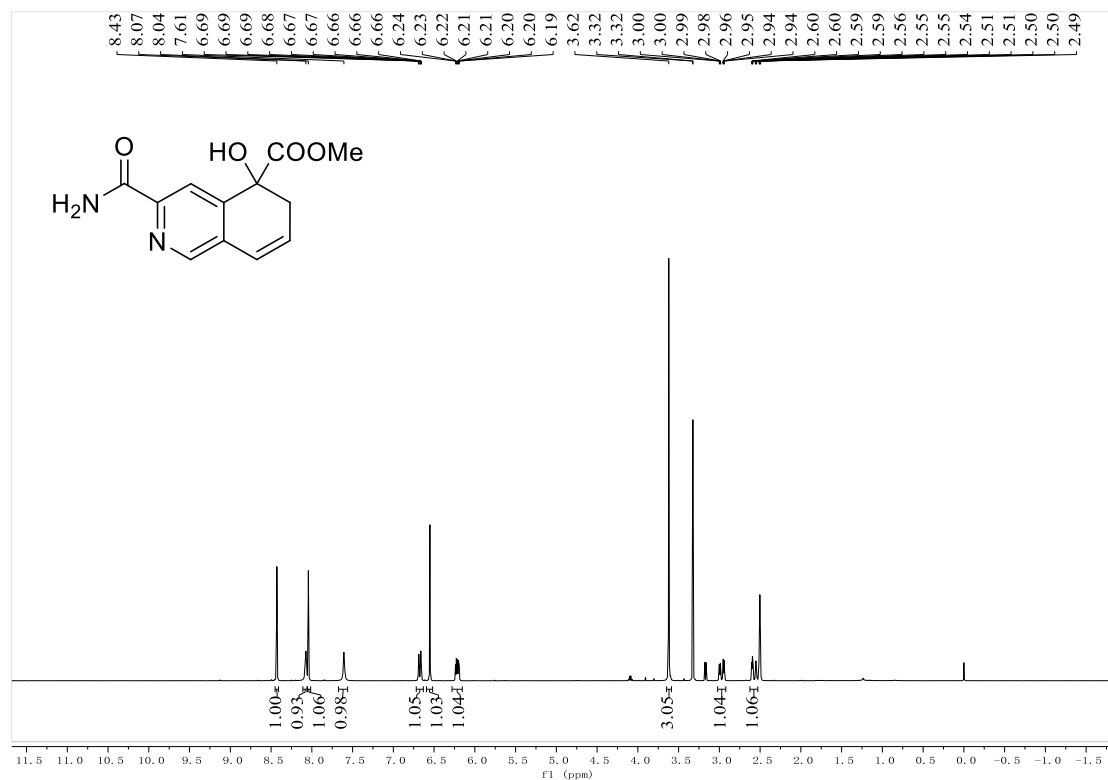

Figure S73 <sup>1</sup>H NMR Spectra of compound **30f** (600 MHz, DMSO-*d*<sub>6</sub>)

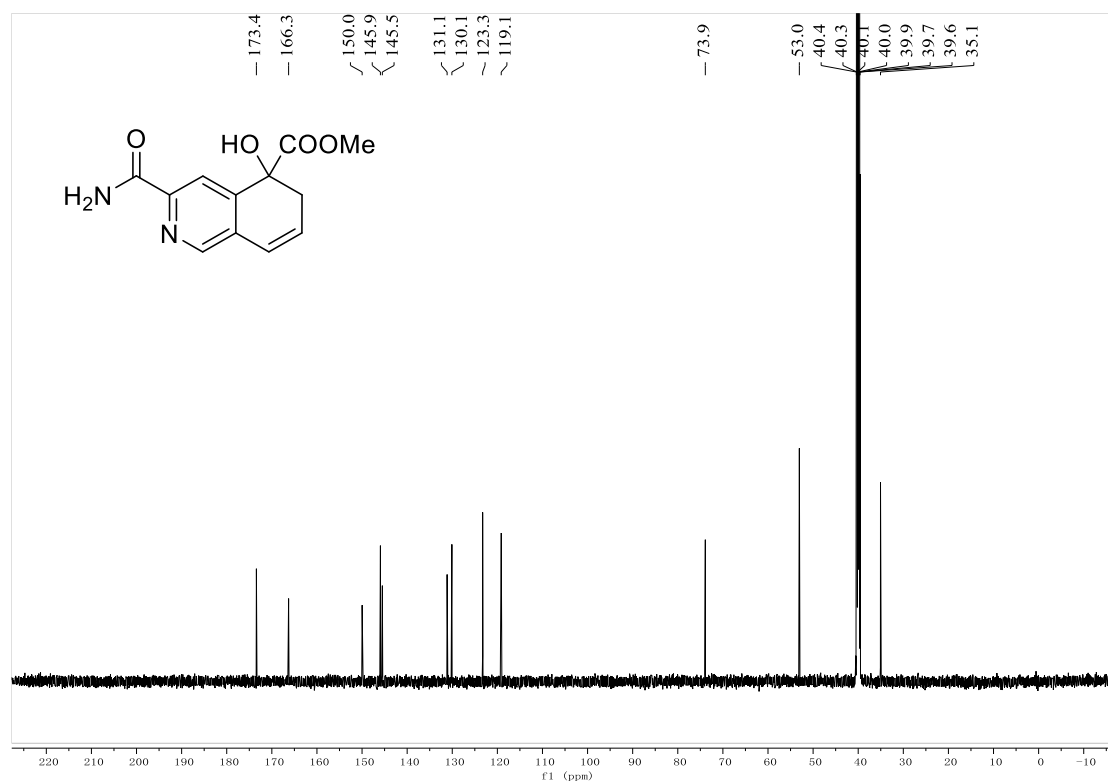

Figure S74 <sup>13</sup>C NMR Spectra of compound **30f** (150 MHz, DMSO-*d*<sub>6</sub>)
